# Supplementary material for: Innovative Approach to Sustainable Marine Invertebrate Chemistry and a Scale-Up Technology for Open Marine Ecosystems
Source: PubMed Central journal article supplement (PMC5983283; doi:10.3390/md16050152), 2018-05-06
Supplement: marinedrugs-16-00152-s001.pdf [file marinedrugs-16-00152-s001.pdf]

# Innovative Approach to Sustainable Marine Invertebrate Chemistry and a Scale-Up Technology for Open Marine Ecosystems.

**Pinelopi Vlachou**<sup>2</sup>, **Géraldine Le Goff**<sup>1</sup>, **Carolina Alonso**<sup>3</sup>, **Pedro A. Álvarez**<sup>3</sup>, **Jean-François Gallard**<sup>1</sup>, **Nikolas Fokialakis**<sup>2</sup> and **Jamal Ouazzani**<sup>1,\*</sup>

1 Institut de Chimie des Substances Naturelles ICSN, Centre National de la Recherche Scientifique, Avenue de la Terrasse 91198, Gif-sur-Yvette, France; geraldine.legoff@cnrs.fr (G.L.G); Jean-francois.Gallard@cnrs.fr (J.F.G), jamal.ouazzani@cnrs.fr (J.O)

2 Department of Pharmacognosy & Natural Products Chemistry, Faculty of Pharmacy, National and Kapodistrian University of Athens, Athens 15771 Greece; pvlachou@pharm.uoa.gr (P.V); fokialakis@pharm.uoa.gr (N.F)

3 iMARE natural S.L. Avda. Habana, 10, 18600, Motril, Spain ; carolina.imare@gmail.com (C.A); pedro.imare@gmail.com (P.A.A)

## Elemental Composition Report

### Single Mass Analysis

Tolerance = 20.0 PPM / DBE: min = -1.5, max = 100.0

Element prediction: Off

Number of isotope peaks used for i-FIT = 9

Monoisotopic Mass, Even Electron Ions

460 formula(e) evaluated with 6 results within limits (all results (up to 1000) for each mass)

Elements Used:

C: 0-50 H: 0-100 N: 0-10 O: 0-10

OUAZZANI\_glegoff56-1 23 (0.608) Cm (21:26)

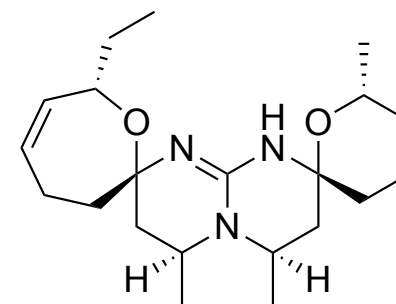

crambescidin 359 (1)

1: TOF MS ES+  
8.30e+004

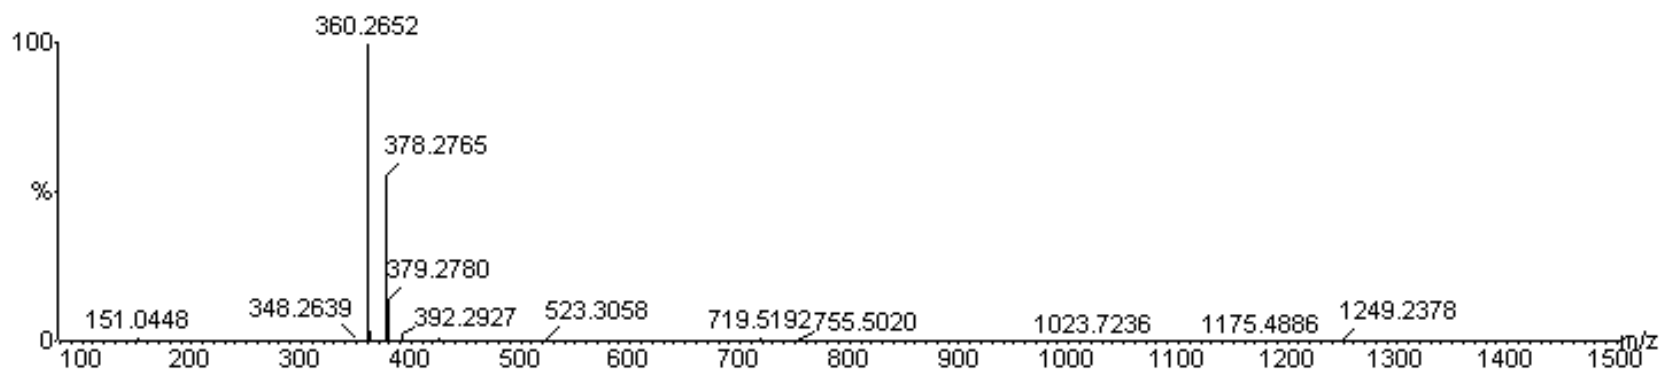

Minimum: -1.5  
Maximum: 5.0 20.0 100.0

| Mass     | Calc. Mass | mDa  | PPM   | DBE  | i-FIT  | i-FIT (Norm) | Formula       |
|----------|------------|------|-------|------|--------|--------------|---------------|
| 360.2652 | 360.2651   | 0.1  | 0.3   | 6.5  | 999.5  | 0.0          | C21 H34 N3 O2 |
|          | 360.2624   | 2.8  | 7.8   | 7.5  | 1006.0 | 6.4          | C17 H30 N9    |
|          | 360.2683   | -3.1 | -8.6  | -1.5 | 1014.2 | 14.7         | C10 H34 N9 O5 |
|          | 360.2691   | -3.9 | -10.8 | 10.5 | 1007.1 | 7.5          | C26 H34 N     |
|          | 360.2611   | 4.1  | 11.4  | 2.5  | 1007.5 | 8.0          | C16 H34 N5 O4 |
|          | 360.2723   | -7.1 | -19.7 | 2.5  | 1008.8 | 9.3          | C15 H34 N7 O3 |

S1- crambescidin 359 (1) HRESIMS

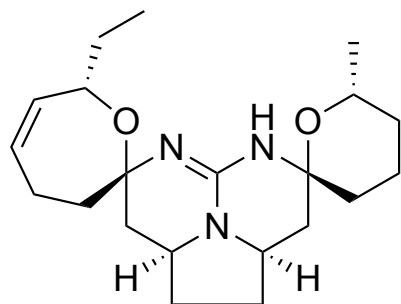

crambescidin 359 (1)

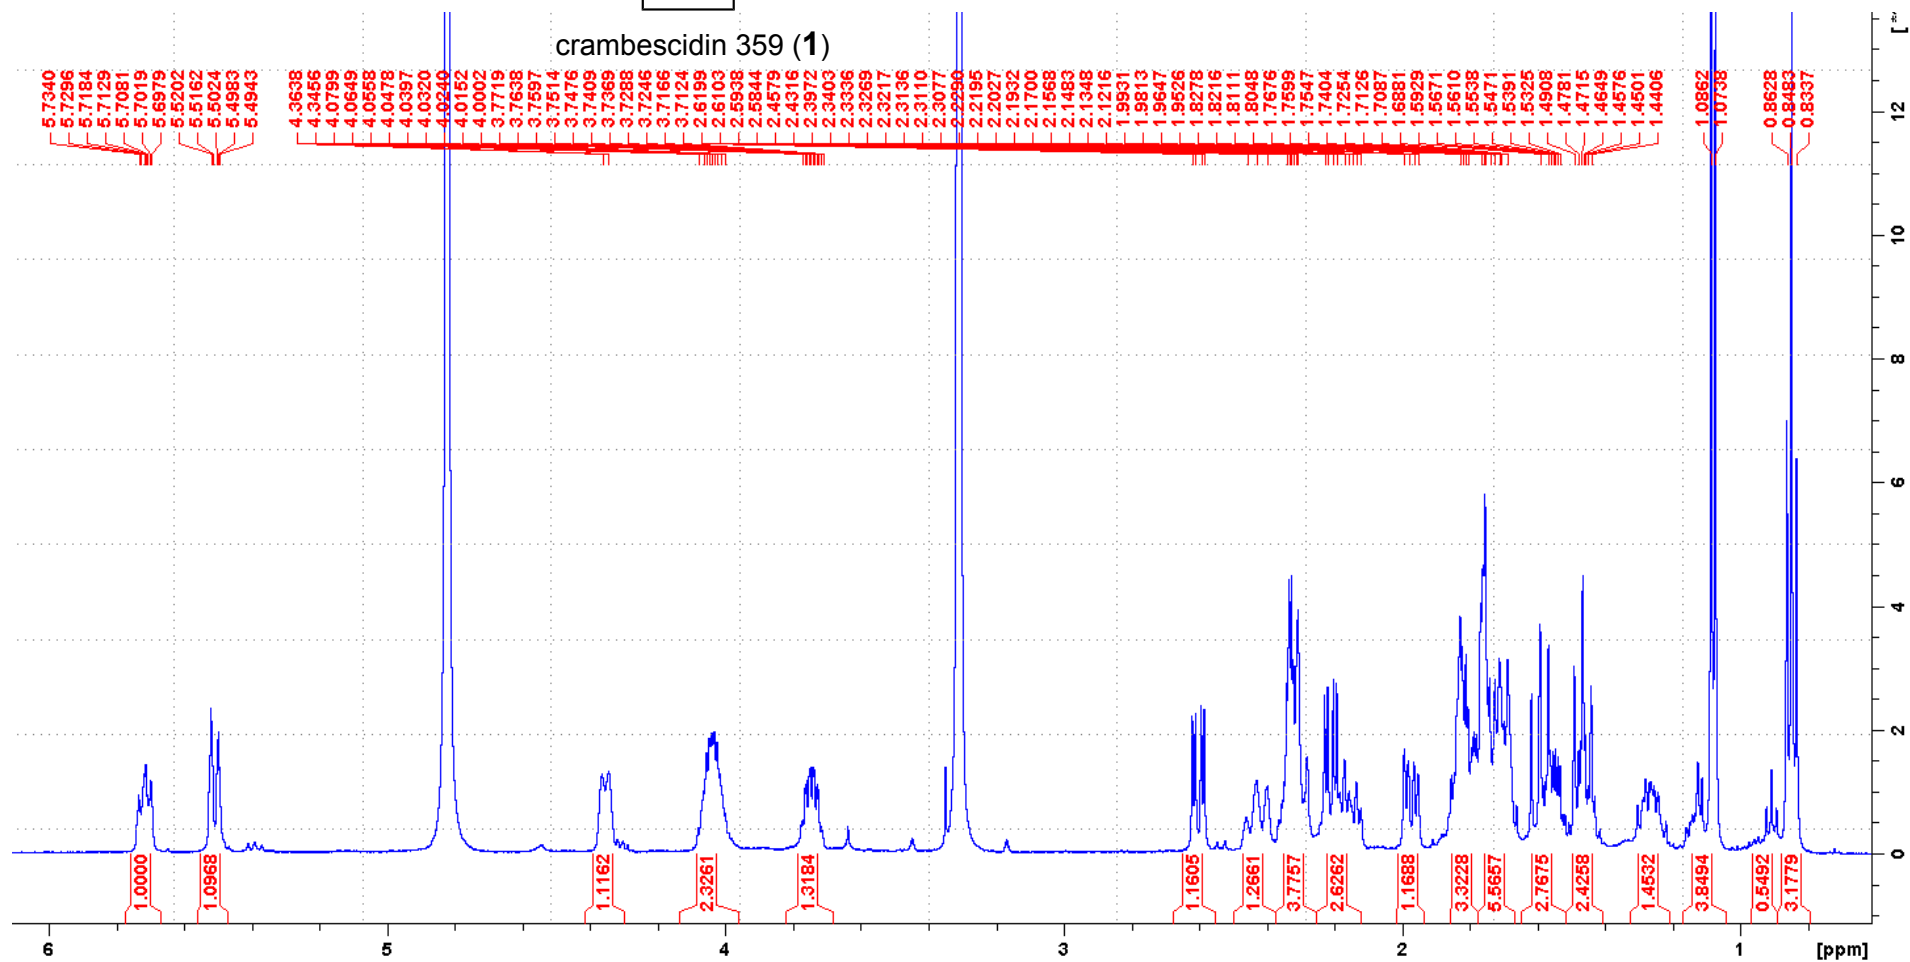

S2- crambescidin 359 (1) <sup>1</sup>H-NMR spectrum (500 MHz, MeOD)

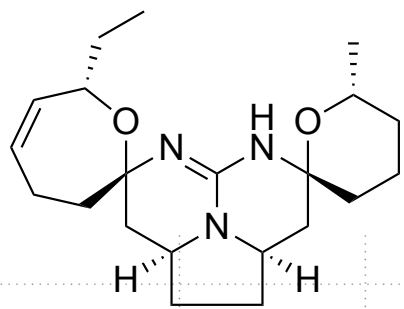

crambescidin 359 (1)

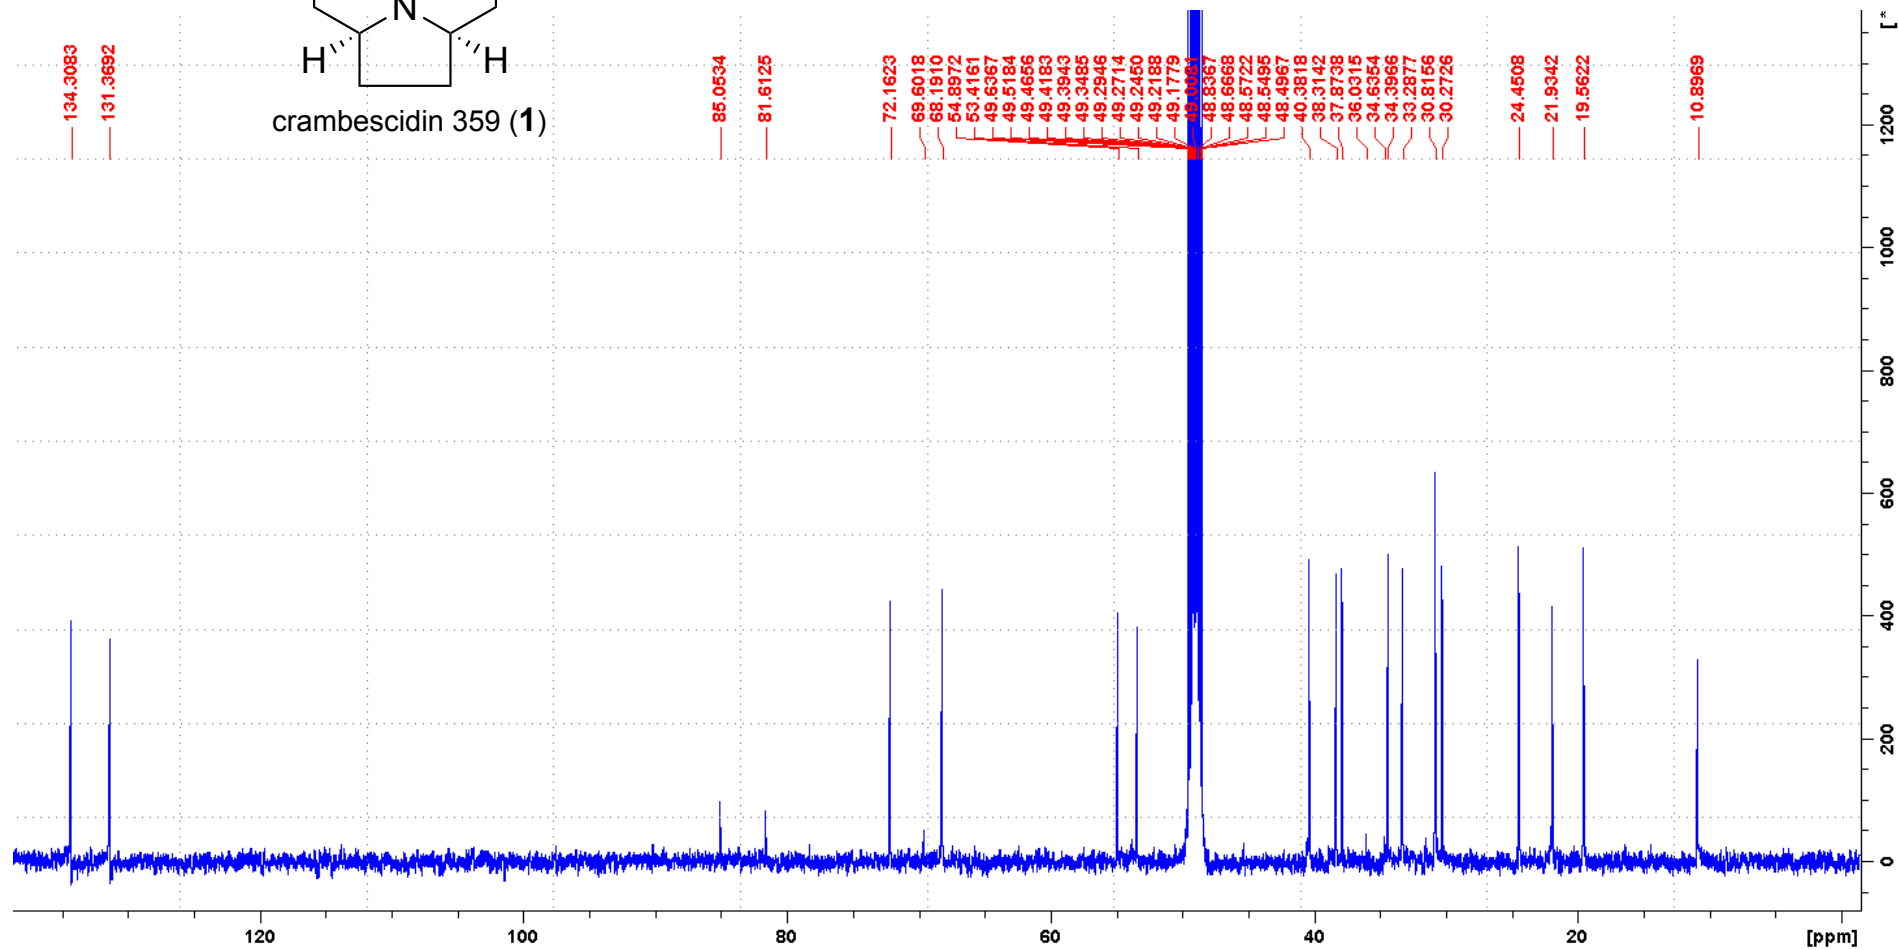

S3- crambescidin 359 (1)  $^{13}\text{C}$ -NMR spectrum (125 MHz, MeOD)

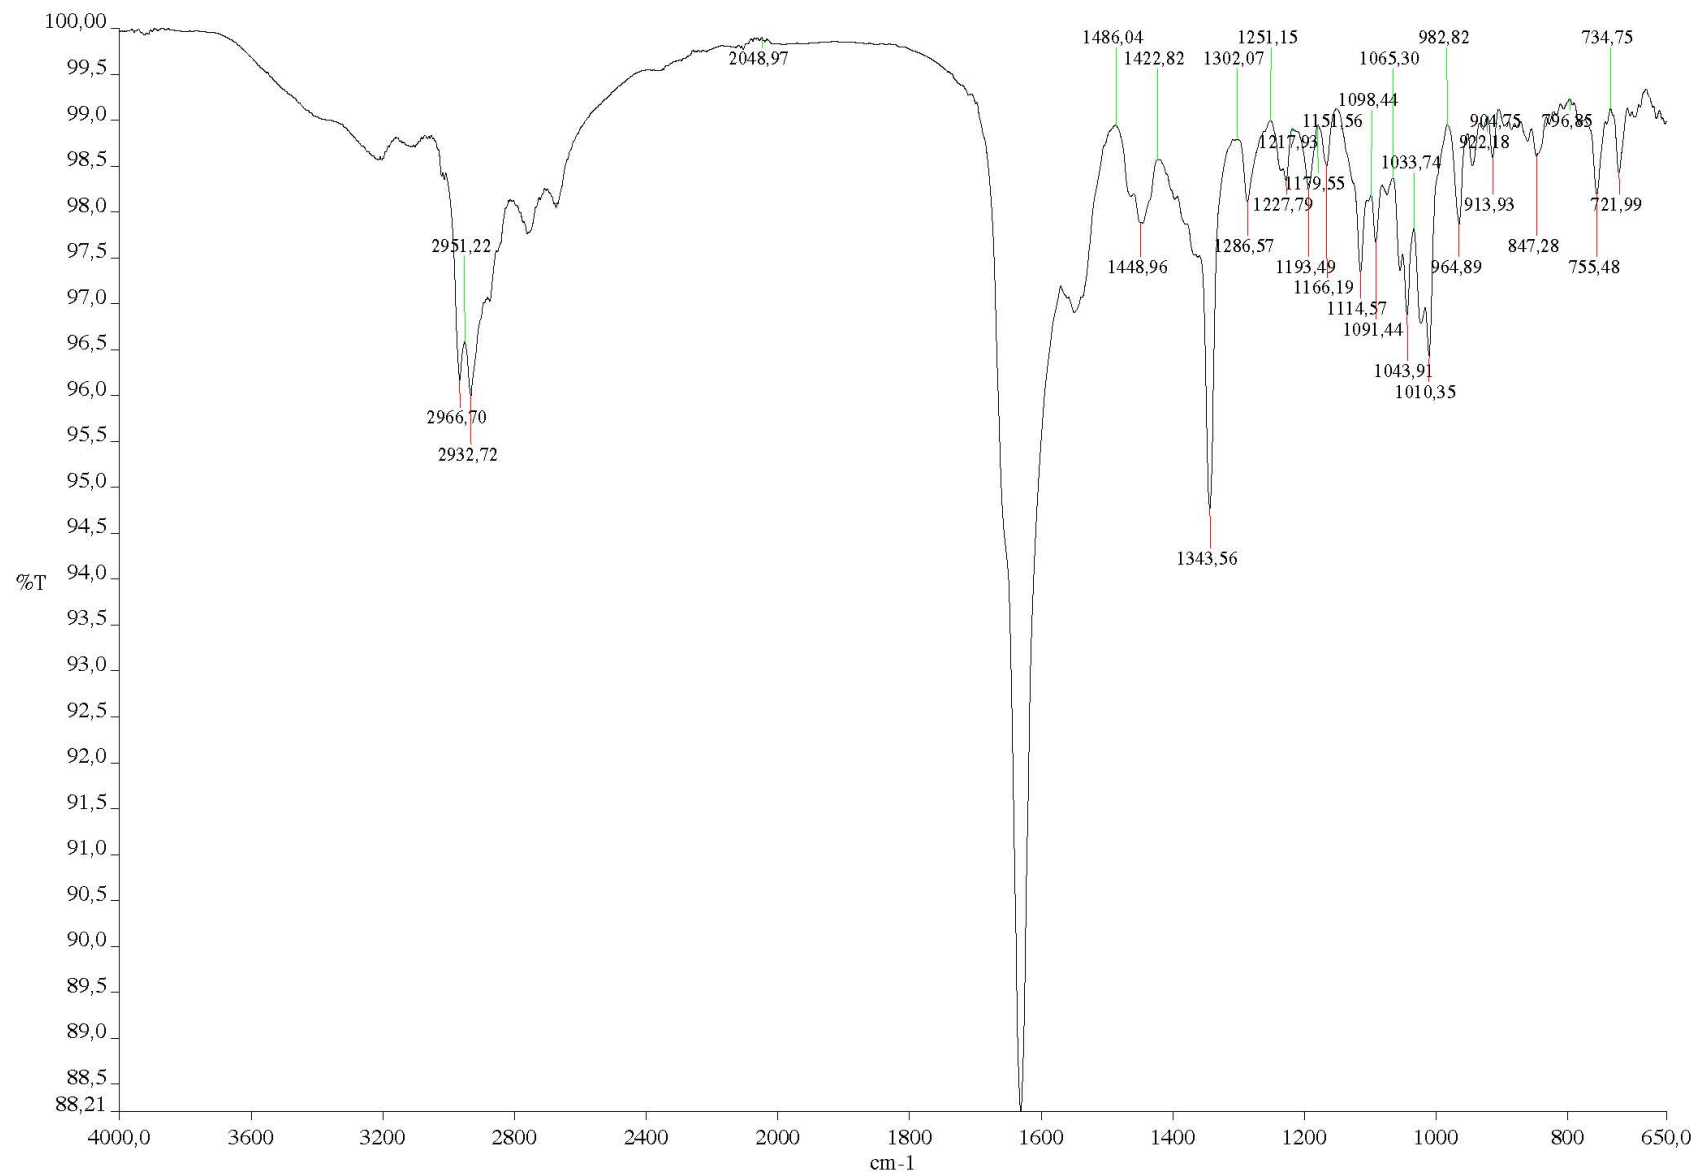

S4- crambescidin 359 (1) IR spectrum

## Elemental Composition Report

### Single Mass Analysis

Tolerance = 10.0 PPM / DBE: min = -1.5, max = 100.0

Element prediction: Off

Number of isotope peaks used for i-FIT = 9

Monoisotopic Mass, Even Electron Ions

526 formula(e) evaluated with 5 results within limits (all results (up to 1000) for each mass)

Elements Used:

C: 0-50 H: 0-100 N: 0-10 O: 0-10

OUAZZANI\_glegoff58-2 24 (0.625) Cm (20:28-39:65x2.000)

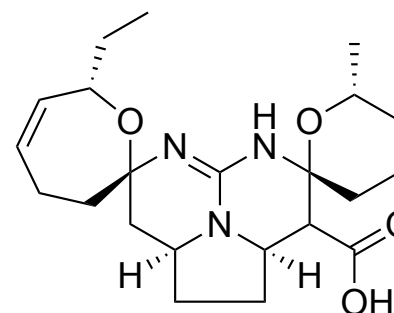

crambescidin acid (2)

Page 1

1: TOF MS ES+  
4.26e+004

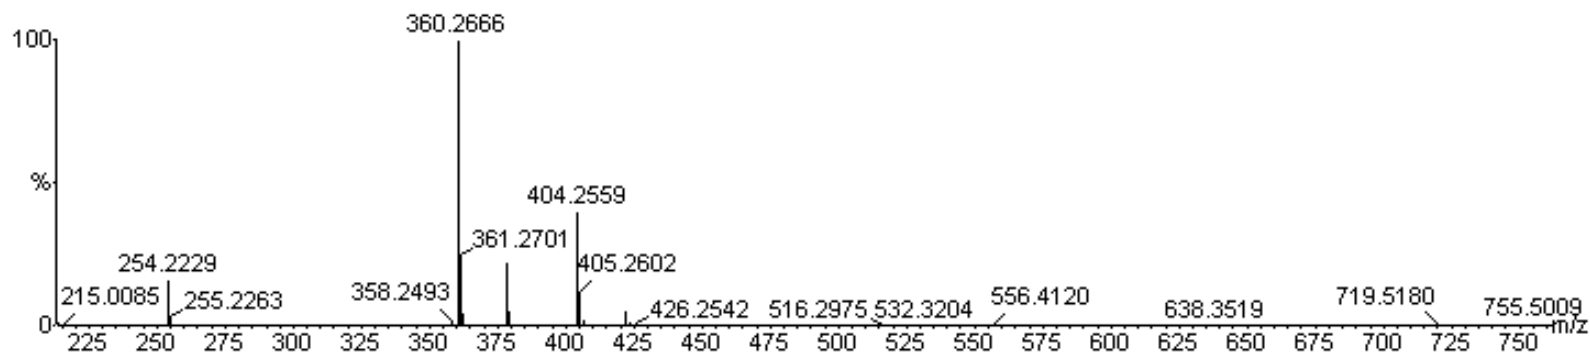

Minimum: -1.5  
Maximum: 5.0 10.0 100.0

| Mass     | Calc. Mass | mDa  | PPM  | DBE  | i-FIT | i-FIT (Norm) | Formula       |
|----------|------------|------|------|------|-------|--------------|---------------|
| 404.2559 | 404.2563   | -0.4 | -1.0 | 12.5 | 292.4 | 3.0          | C23 H30 N7    |
|          | 404.2549   | 1.0  | 2.5  | 7.5  | 289.5 | 0.1          | C22 H34 N3 O4 |
|          | 404.2581   | -2.2 | -5.4 | -0.5 | 306.9 | 17.5         | C11 H34 N9 O7 |
|          | 404.2590   | -3.1 | -7.7 | 11.5 | 293.7 | 4.3          | C27 H34 N O2  |
|          | 404.2522   | 3.7  | 9.2  | 8.5  | 298.9 | 9.5          | C18 H30 N9 O2 |

S5- crambescidin acid (2) HRESIMS

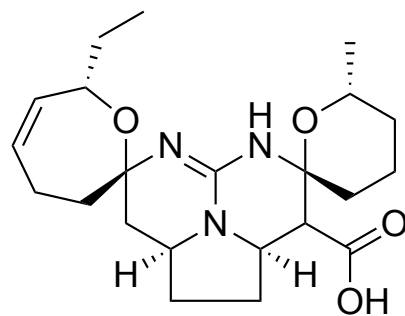

crambescidin acid (**2**)

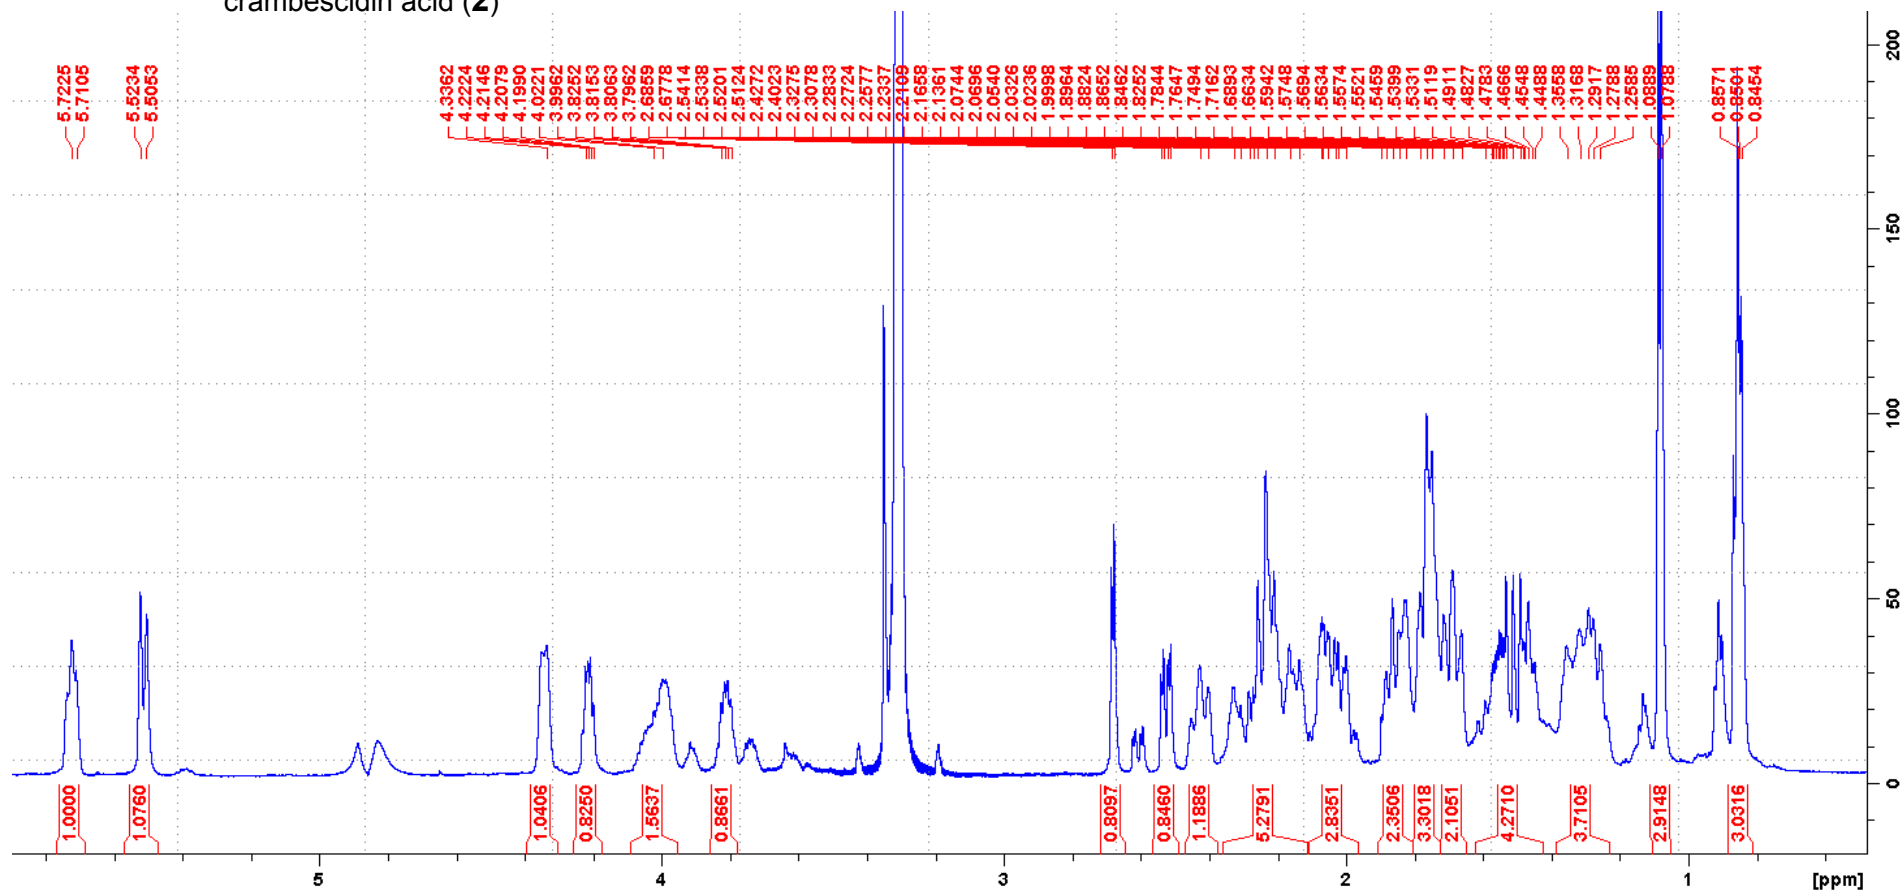

S6- crambescidin acid (**2**) <sup>1</sup>H-NMR spectrum (600 MHz, MeOD)

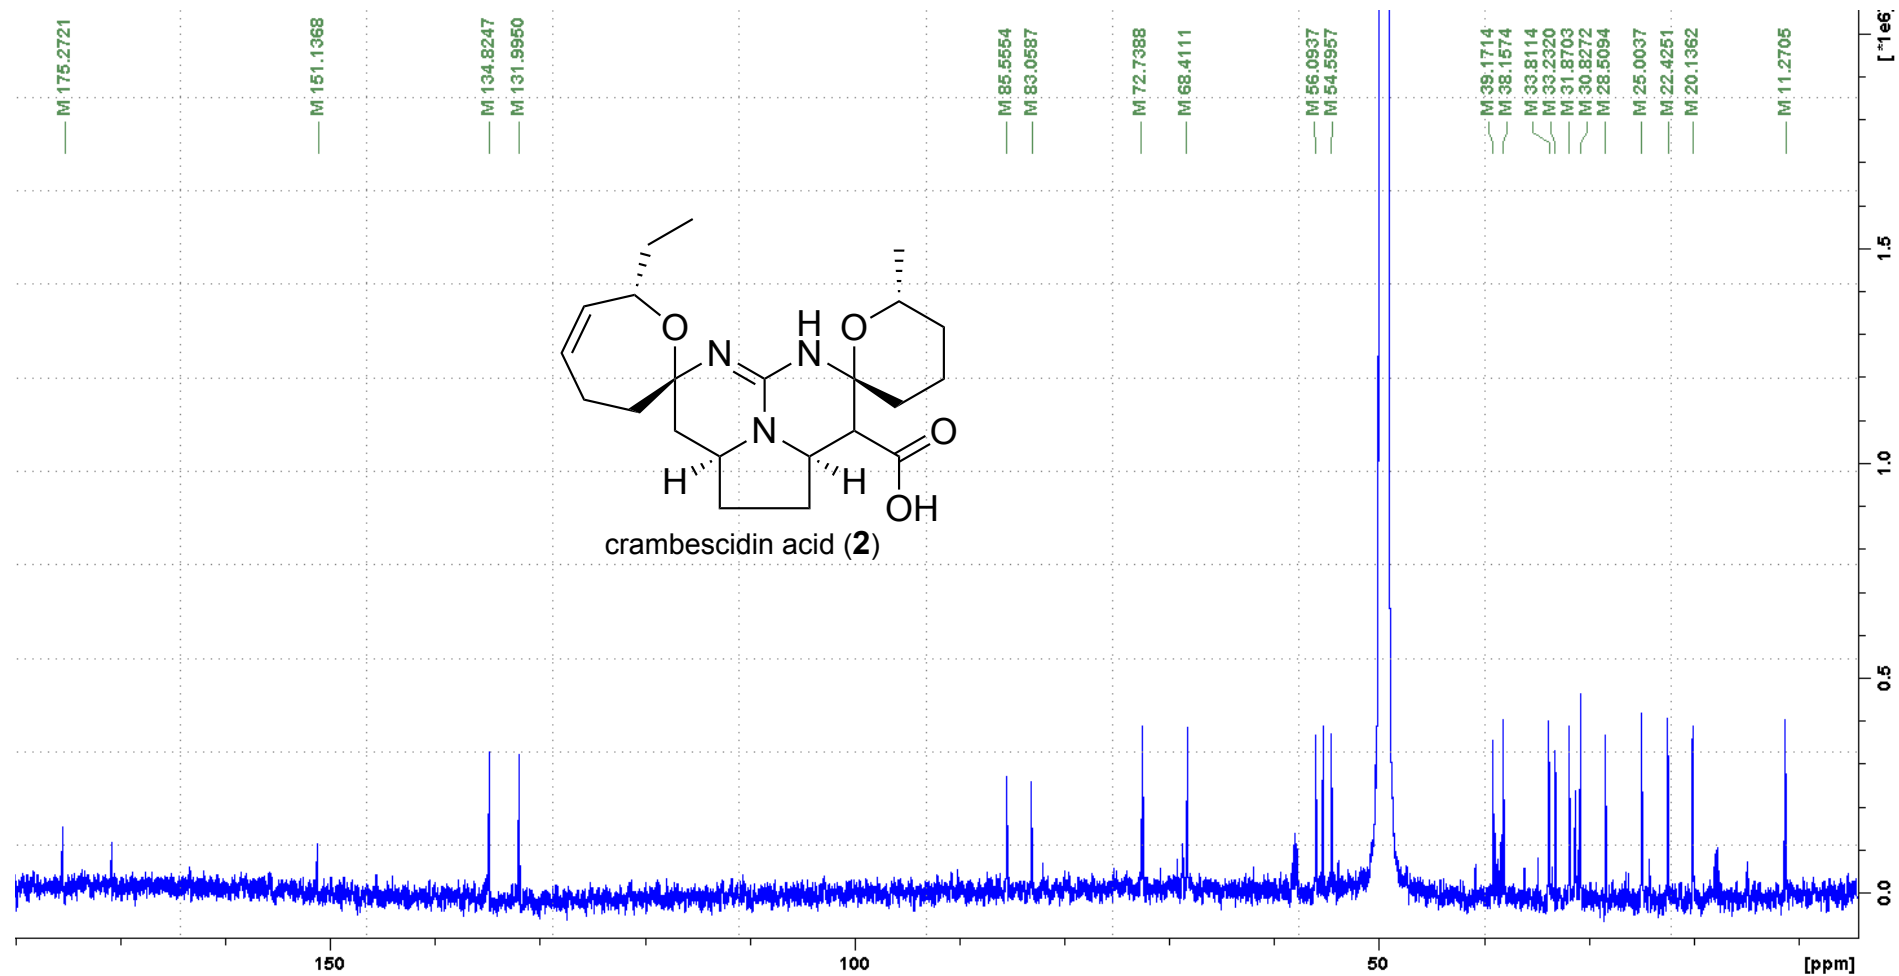

S7- crambescidin acid (2)  $^{13}\text{C}$ -NMR spectrum (150 MHz, MeOD)



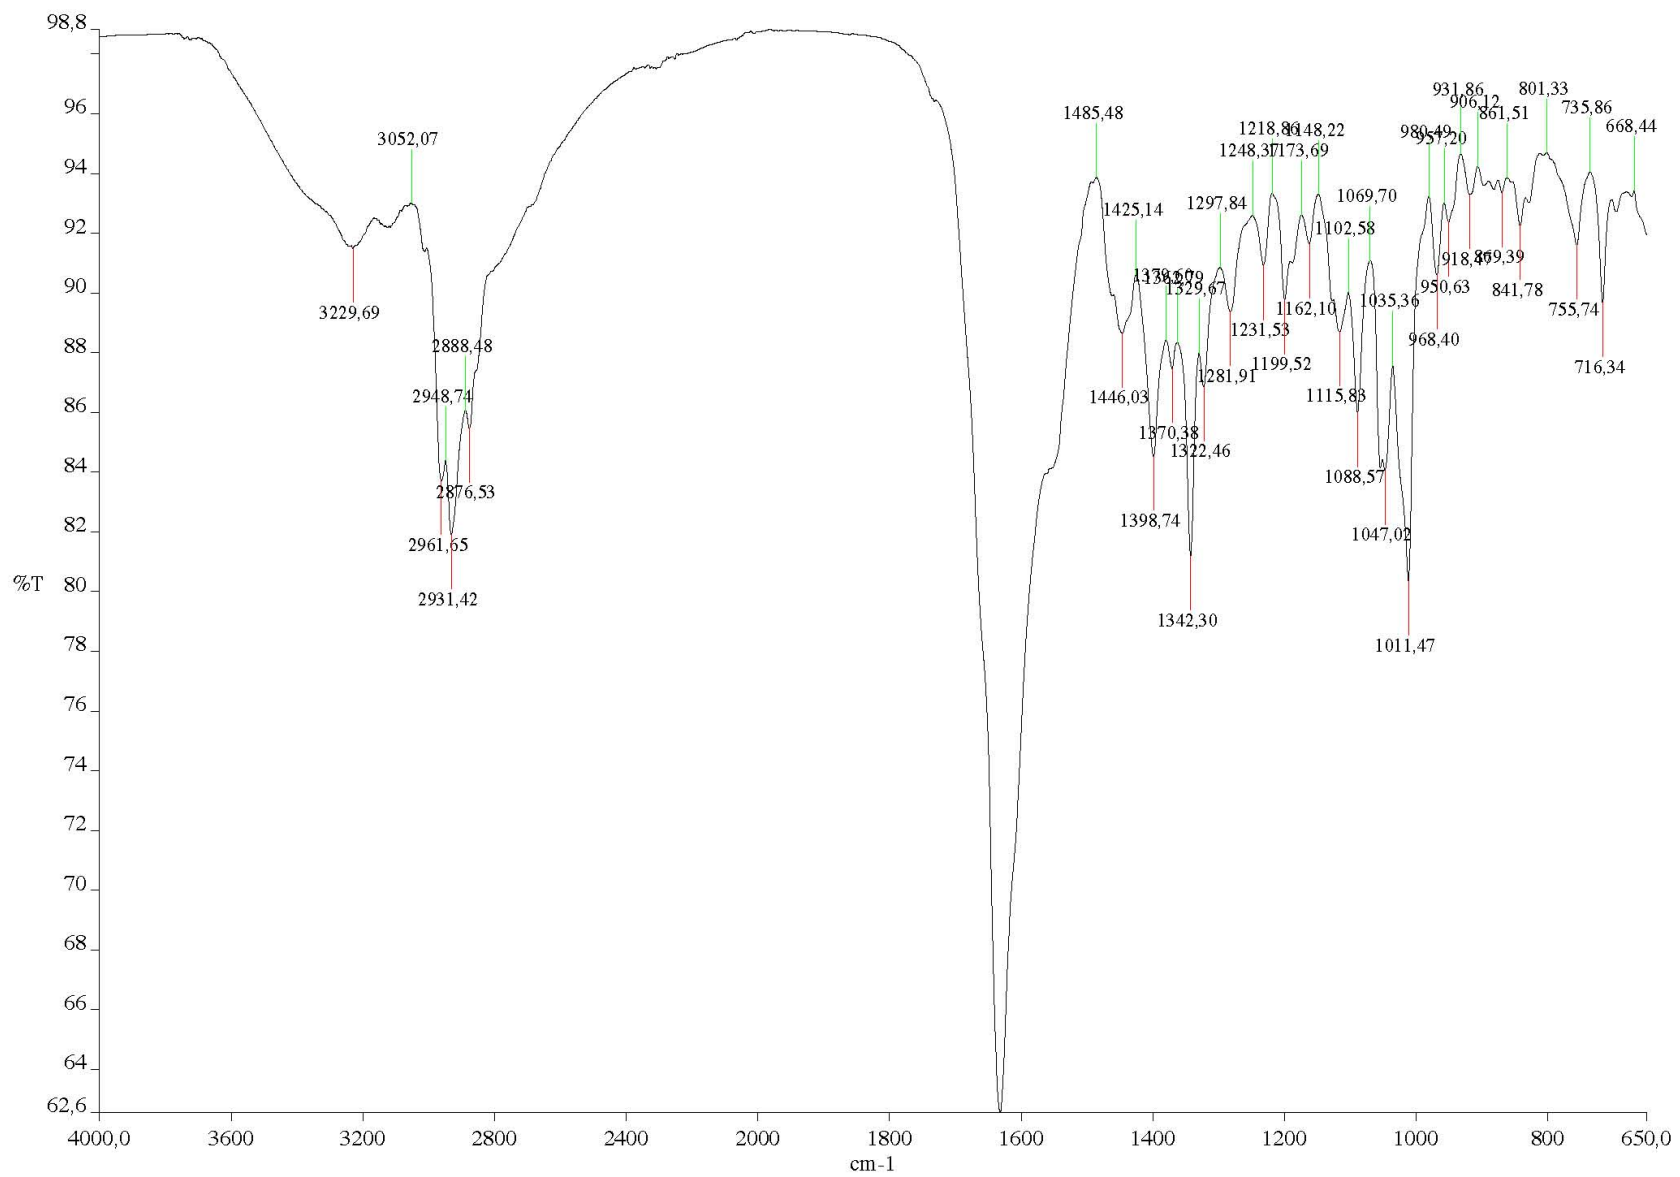

c:\pel\_data\spectra\eq95\crambescidin 403.001

S8- crambescidin acid (2) IR spectrum

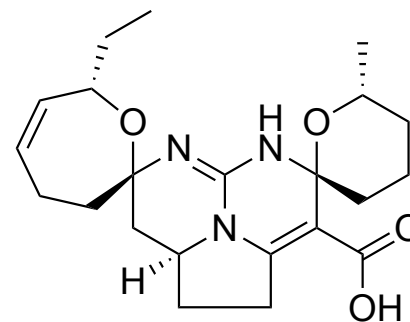

crambescidin 401 (3)

## Elemental Composition Report

### Single Mass Analysis

Tolerance = 10.0 PPM / DBE: min = -1.5, max = 100.0

Element prediction: Off

Number of isotope peaks used for i-FIT = 9

Monoisotopic Mass, Even Electron Ions

519 formula(e) evaluated with 4 results within limits (all results (up to 1000) for each mass)

Elements Used:

C: 0-50 H: 0-100 N: 0-10 O: 0-10

OUAZZANI\_glegoff58-1 23 (0.607) Cm (18:28-34:67x2.000)

1: TOF MS ES+

4.44e+004

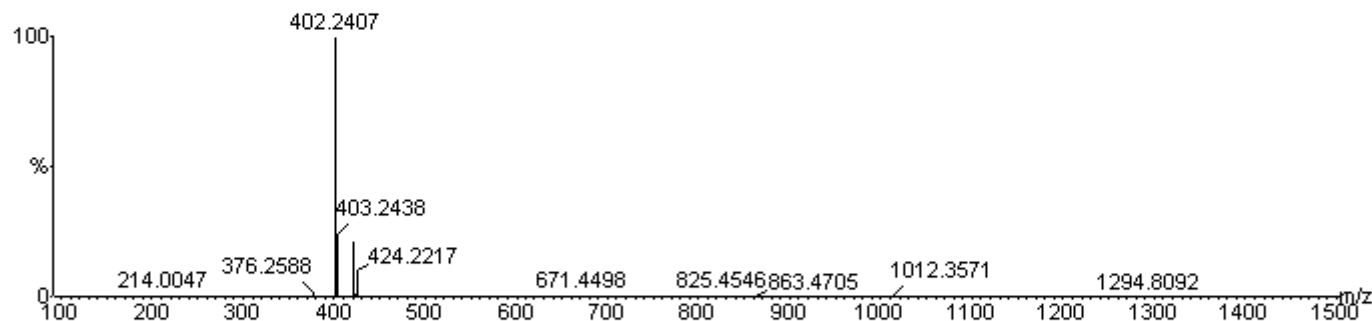

Minimum:

-1.5

Maximum:

5.0

10.0

100.0

| Mass     | Calc. Mass | mDa  | PPM  | DBE  | i-FIT | i-FIT (Norm) | Formula       |
|----------|------------|------|------|------|-------|--------------|---------------|
| 402.2407 | 402.2406   | 0.1  | 0.2  | 13.5 | 520.2 | 3.4          | C23 H28 N7    |
|          | 402.2393   | 1.4  | 3.5  | 8.5  | 516.8 | 0.0          | C22 H32 N3 O4 |
|          | 402.2425   | -1.8 | -4.5 | 0.5  | 521.2 | 4.4          | C11 H32 N9 O7 |
|          | 402.2433   | -2.6 | -6.5 | 12.5 | 525.0 | 8.2          | C27 H32 N O2  |

## S9- crambescidin 401 (3) HRESIMS

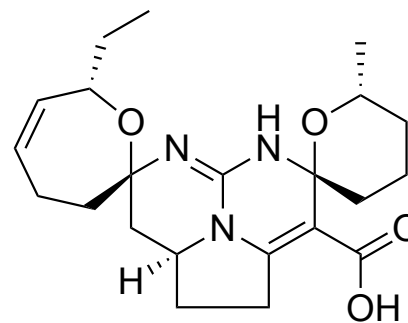

crambescidin 401 (**3**)

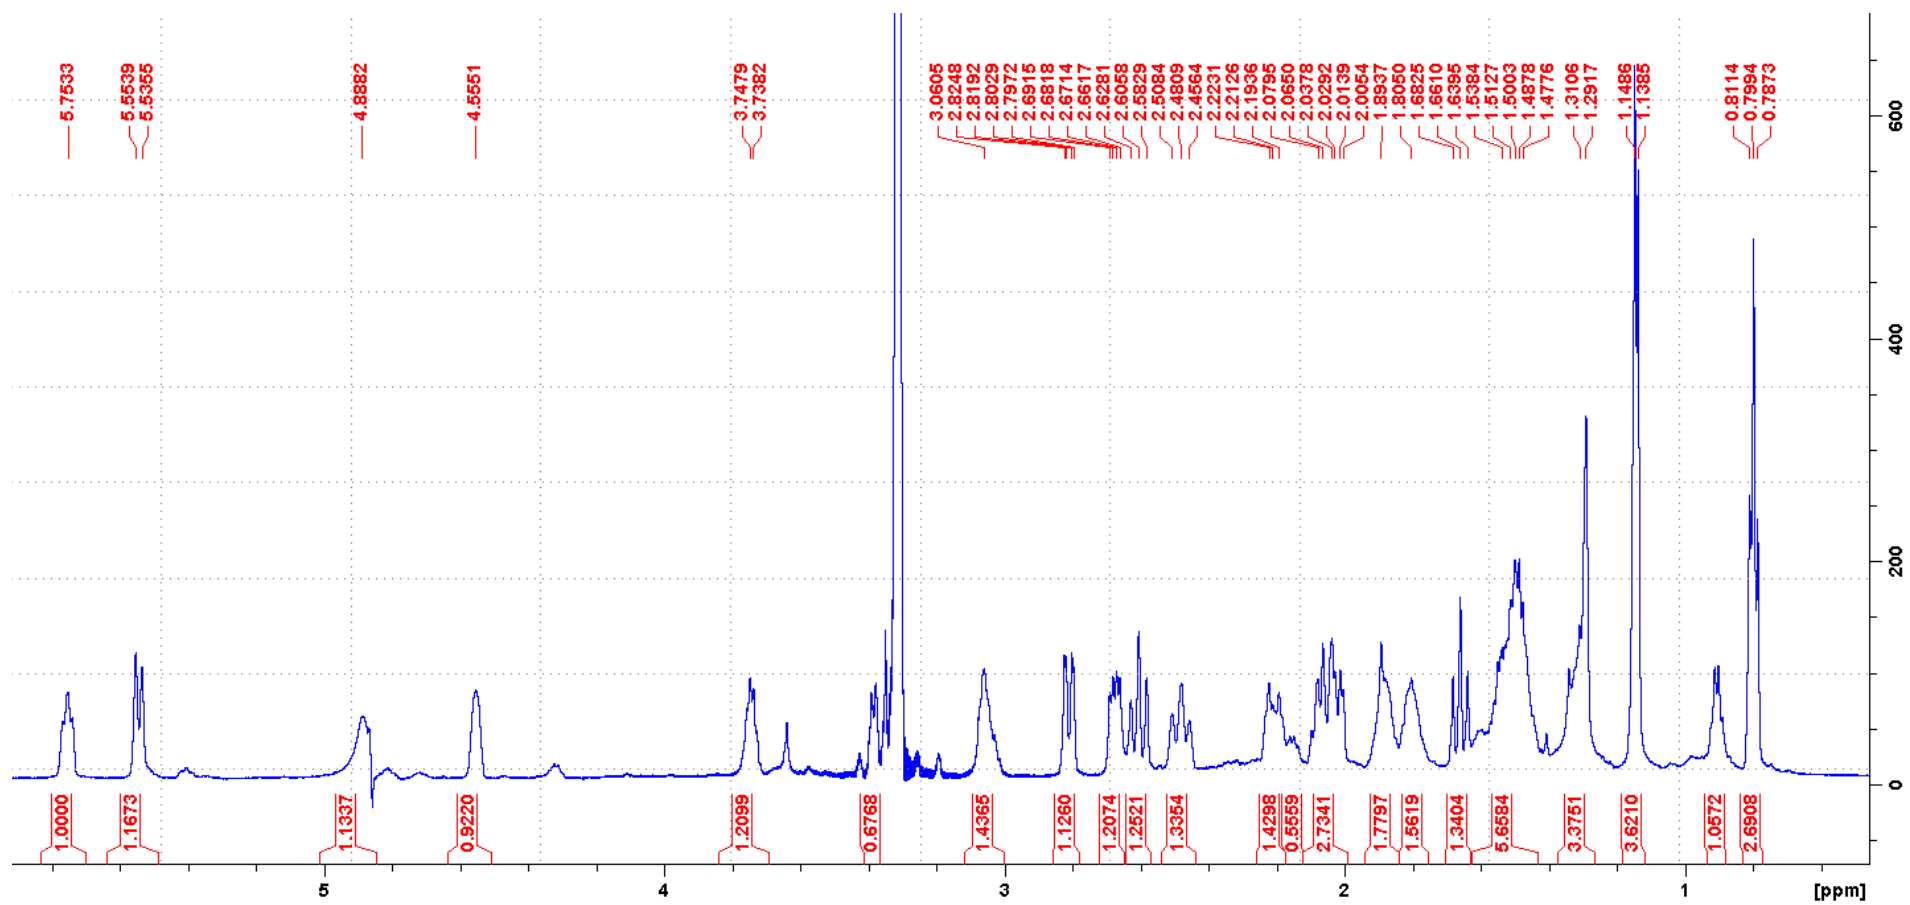

S10- crambescidin 401 (**3**)  $^1\text{H-NMR}$  spectrum (600 MHz, MeOD)

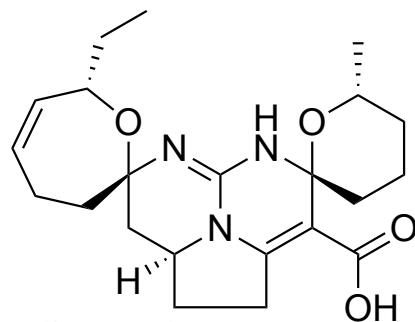

crambescidin 401 (**3**)

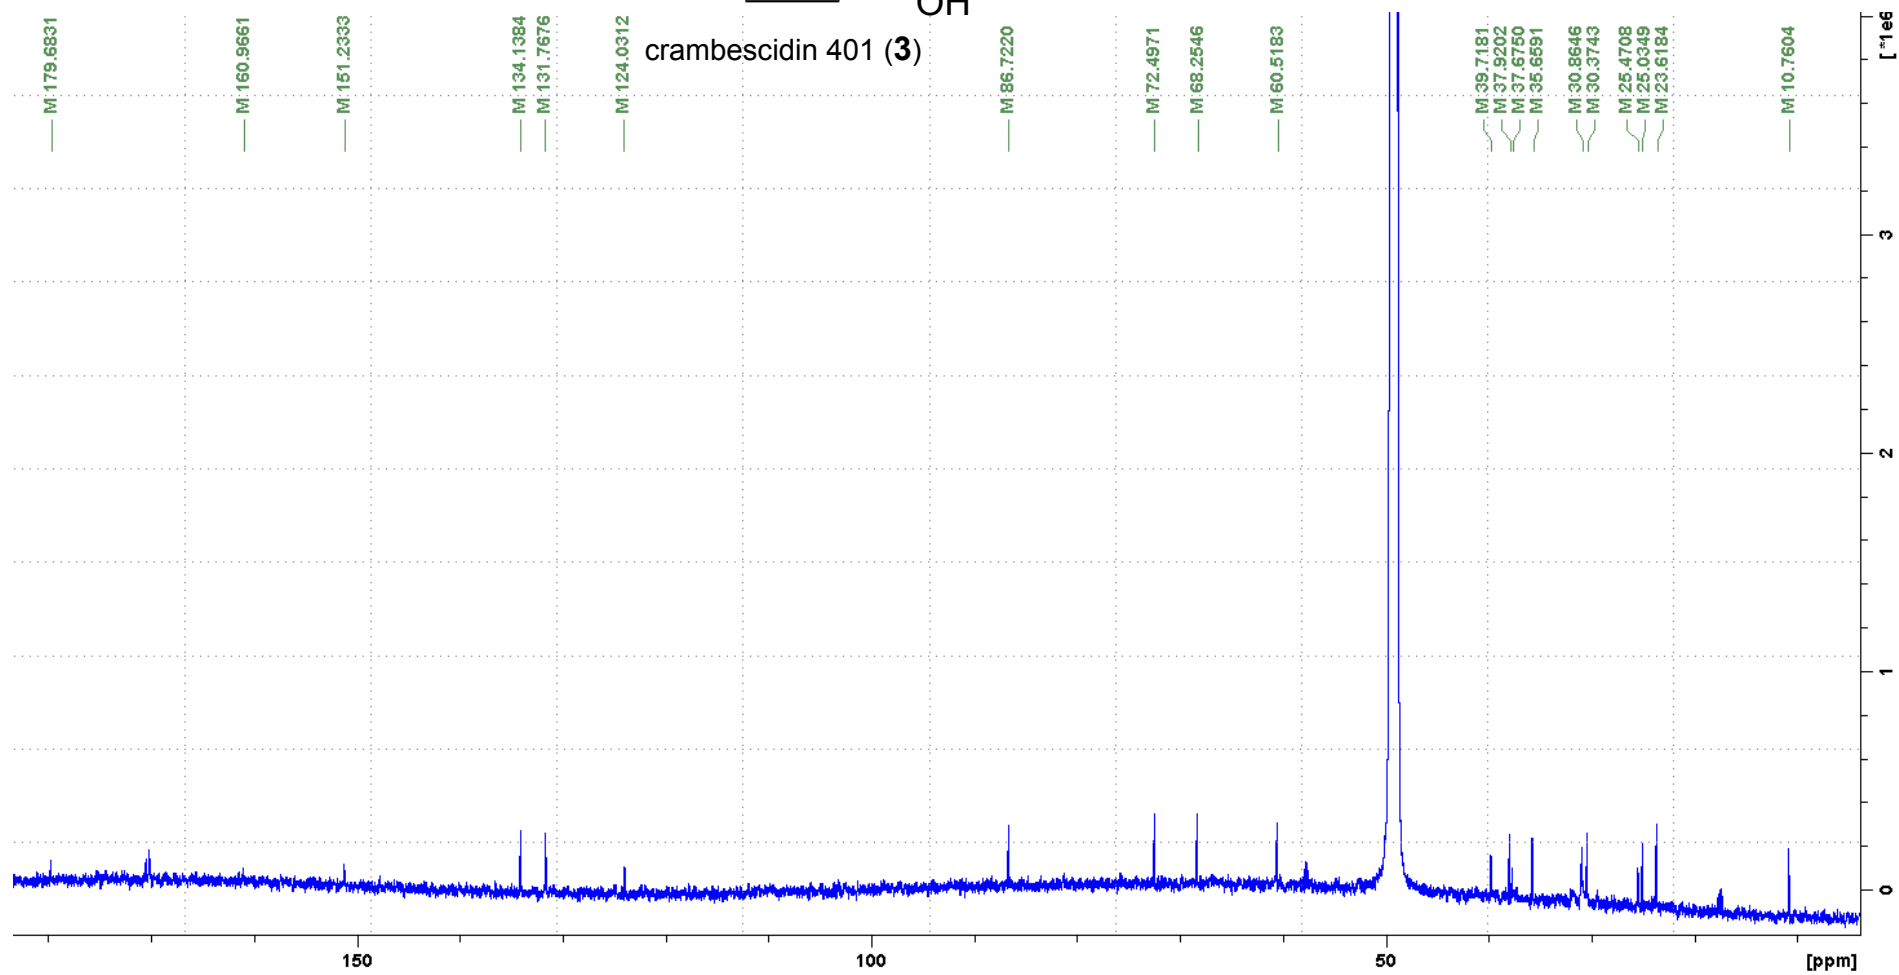

S11- crambescidin 401 (**3**)  $^{13}\text{C}$ -NMR spectrum (150 MHz, MeOD)

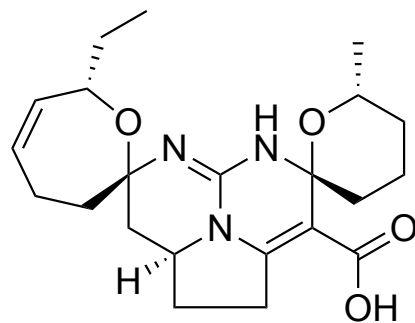

crambescidin 401 (3)

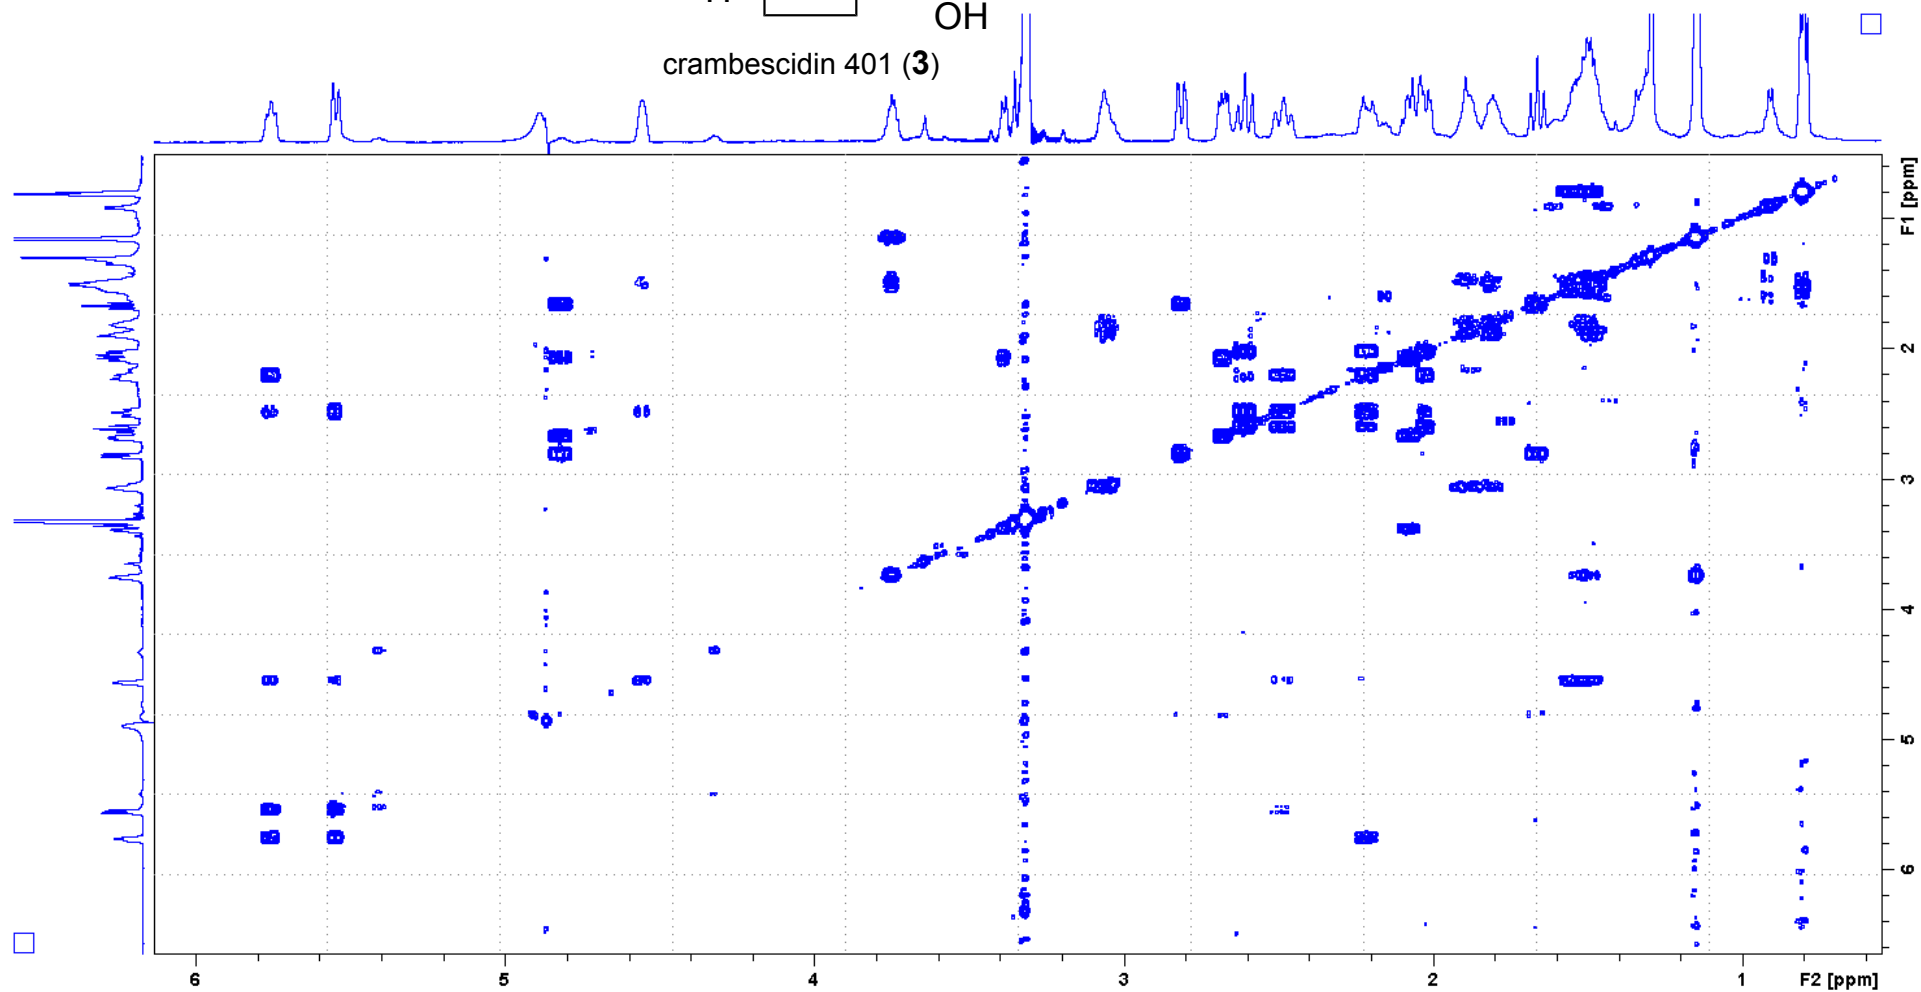

S12- crambescidin 401 (3)  $^1\text{H}$ - $^1\text{H}$  COSY spectrum (600 MHz, MeOD)

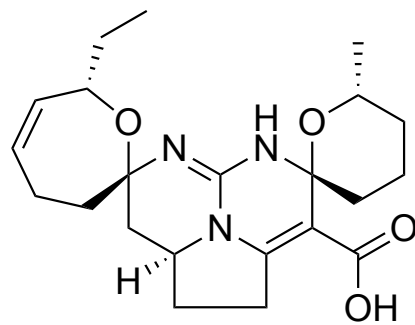

crambescidin 401 (3)

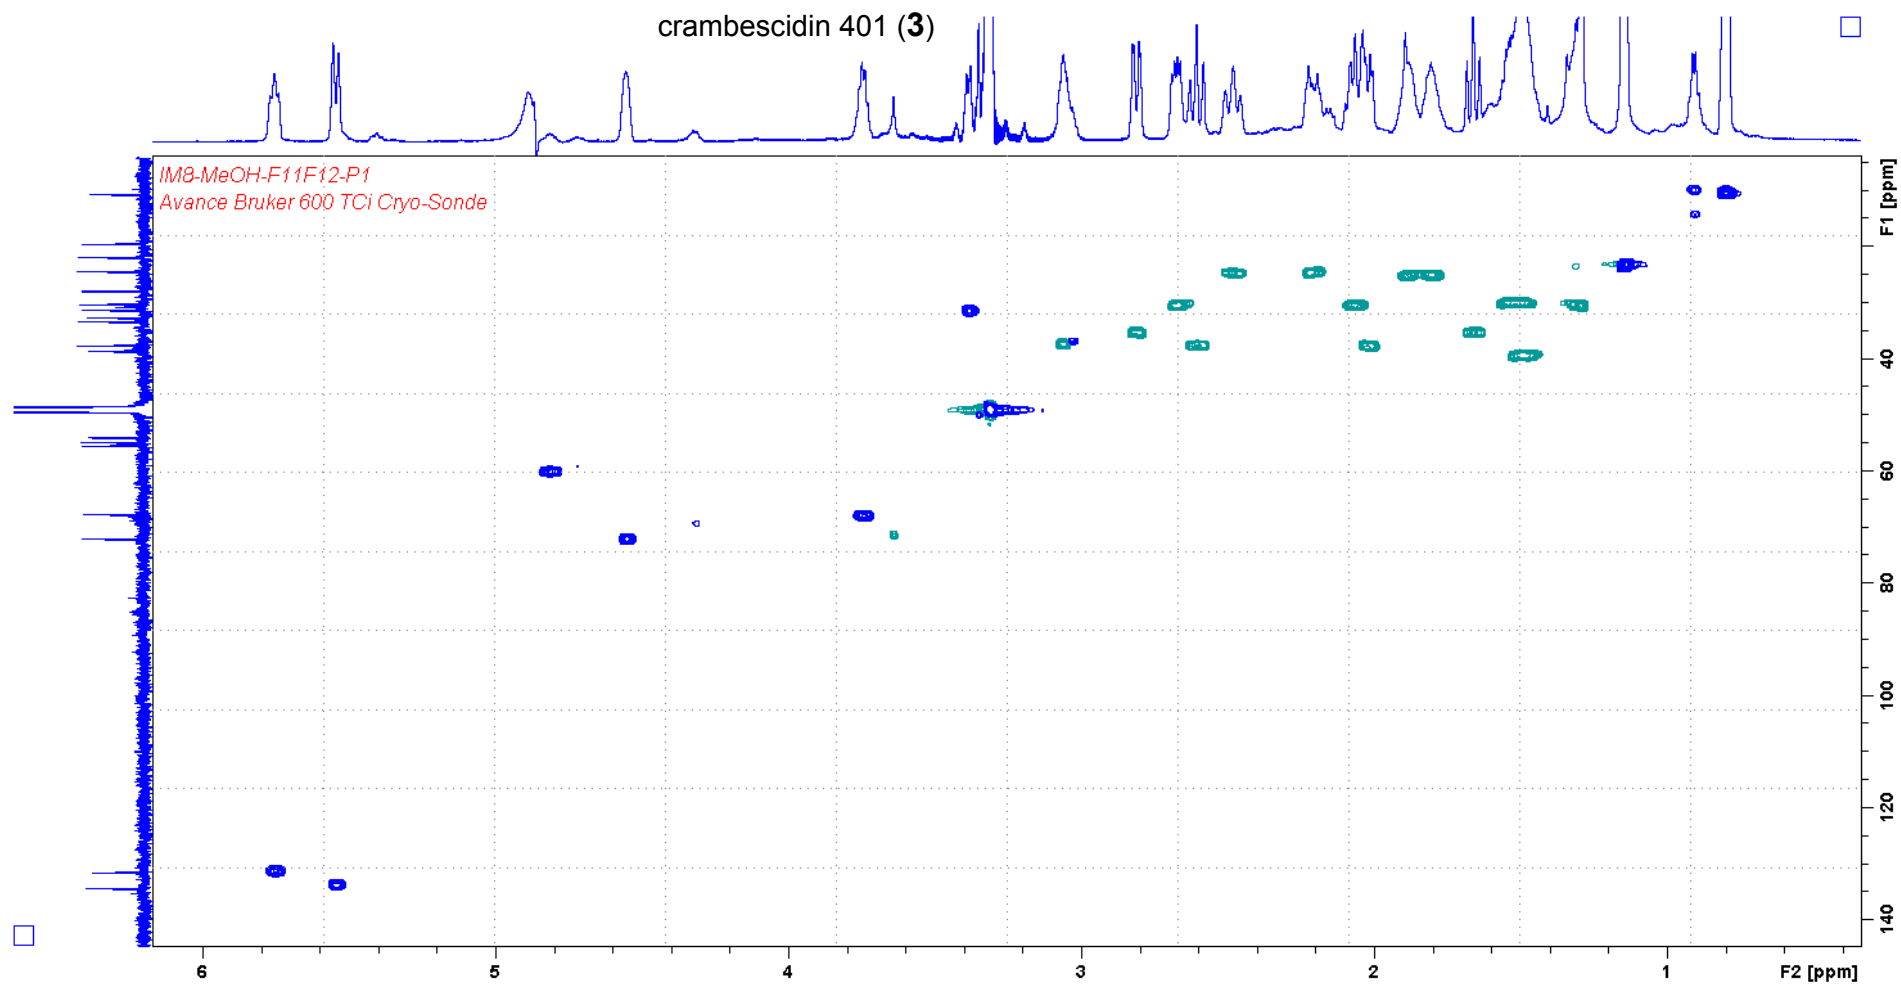

S13- crambescidin 401 (3)  $^1\text{H}$ - $^{13}\text{C}$  HSQC spectrum (600 MHz, MeOH)

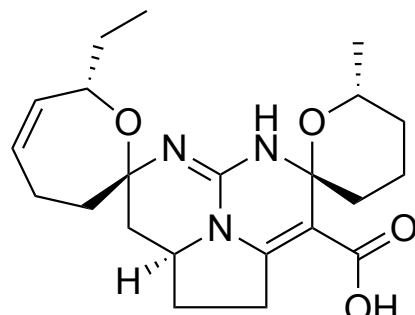

crambescidin 401 (3)

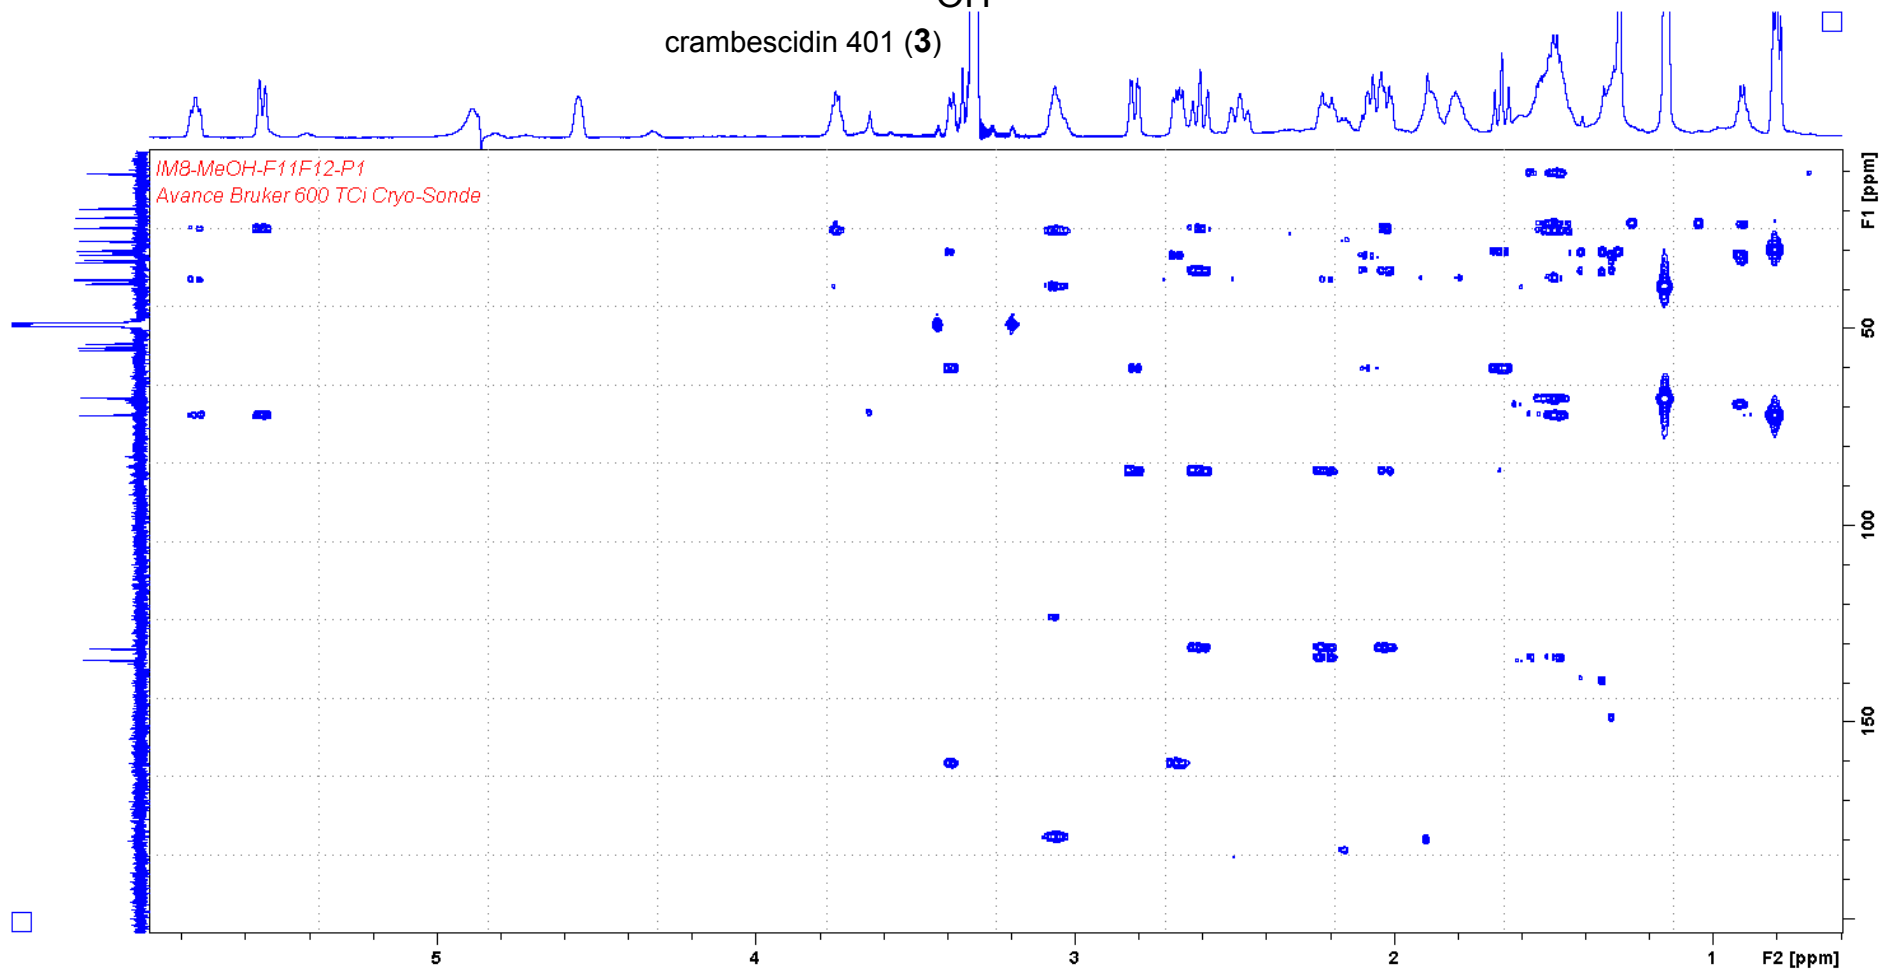

S14- crambescidin 401 (3)  $^1\text{H}$ - $^{13}\text{C}$  HMBC spectrum (600 MHz, MeOD)

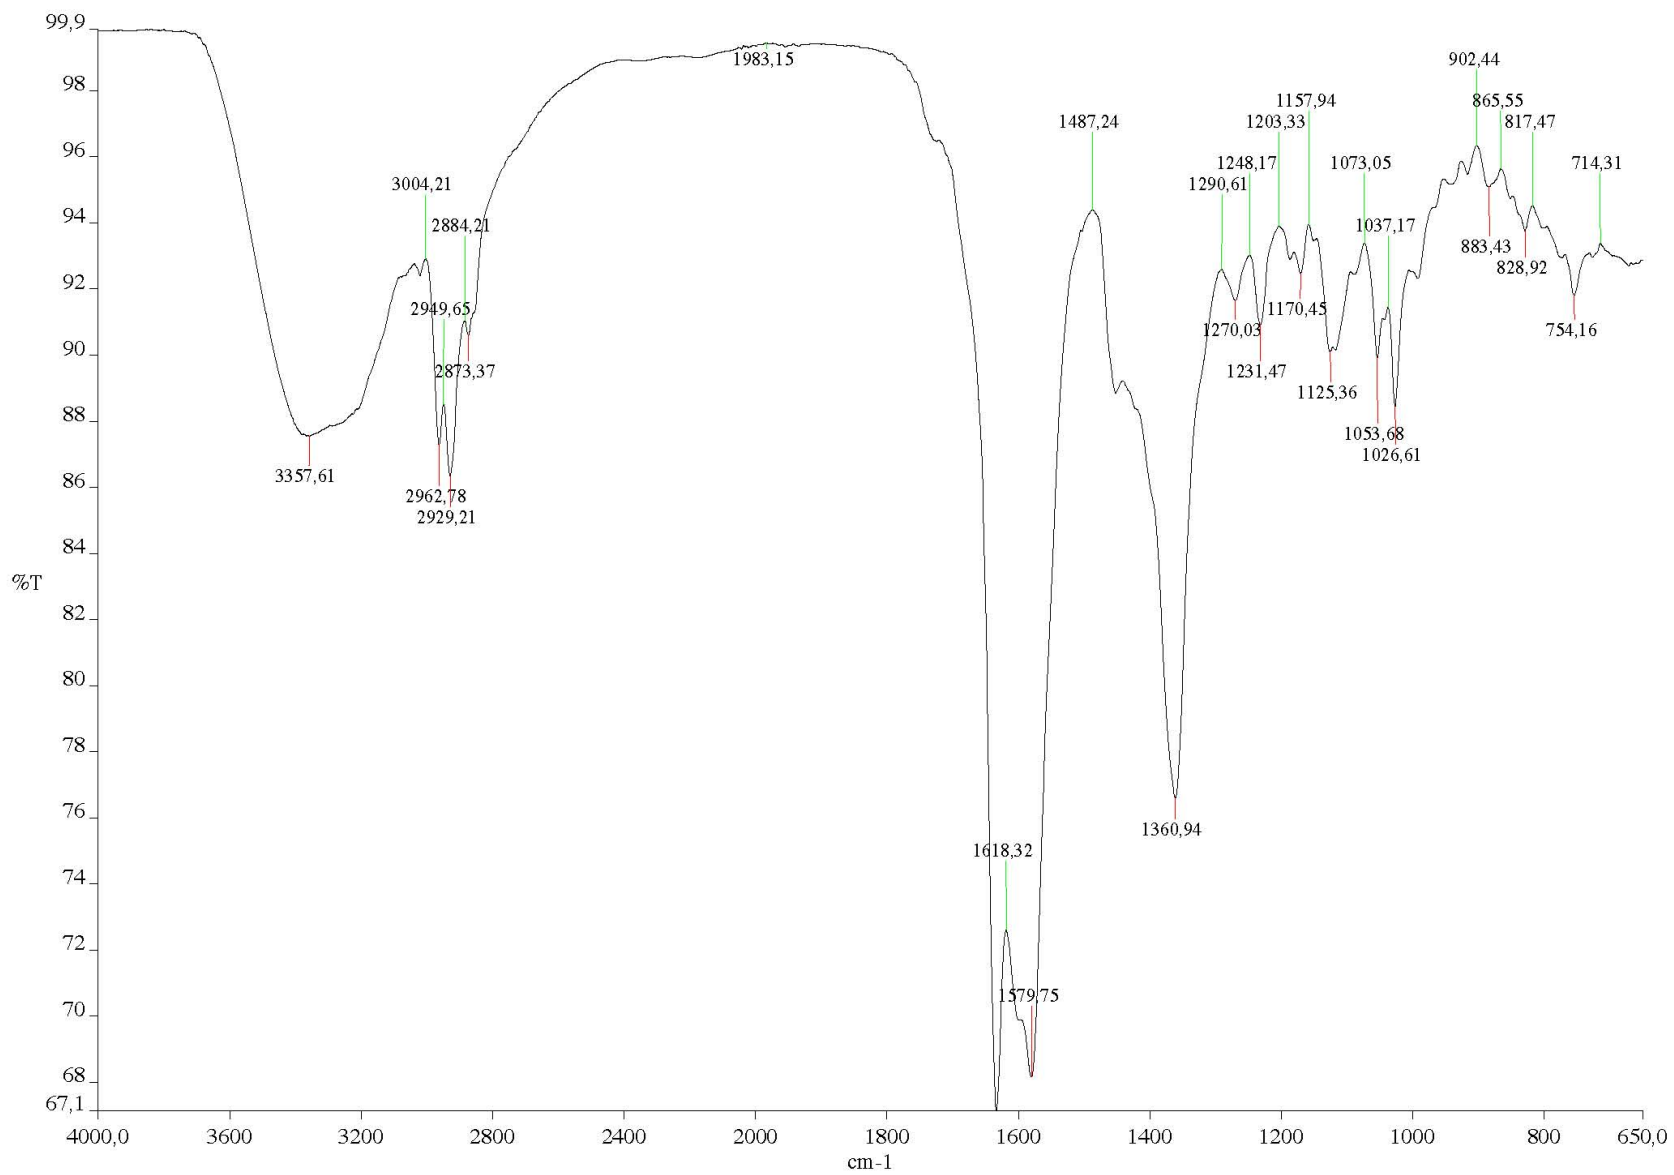

c:\pel\_data\spectra\eq95\crambescidin 401.001

S15- crambescidin 401 (3) IR spectrum



## Elemental Composition Report

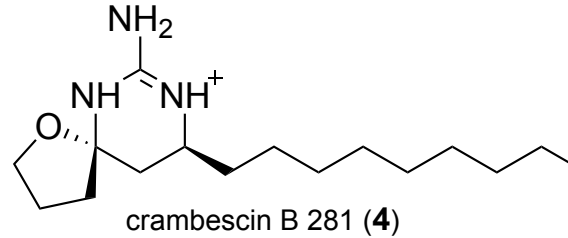

Page 1

### Single Mass Analysis

Tolerance = 20.0 PPM / DBE: min = -1.5, max = 100.0

Element prediction: Off

Number of isotope peaks used for i-FIT = 9

Monoisotopic Mass, Even Electron Ions

344 formula(e) evaluated with 2 results within limits (all results (up to 1000) for each mass)

Elements Used:

C: 0-50 H: 0-100 N: 0-10 O: 0-10

OUAZZANI\_glegoff57-4 22 (0.590) Cm (19:28-35:70x2.000)

1: TOF MS ES+  
2.26e+005

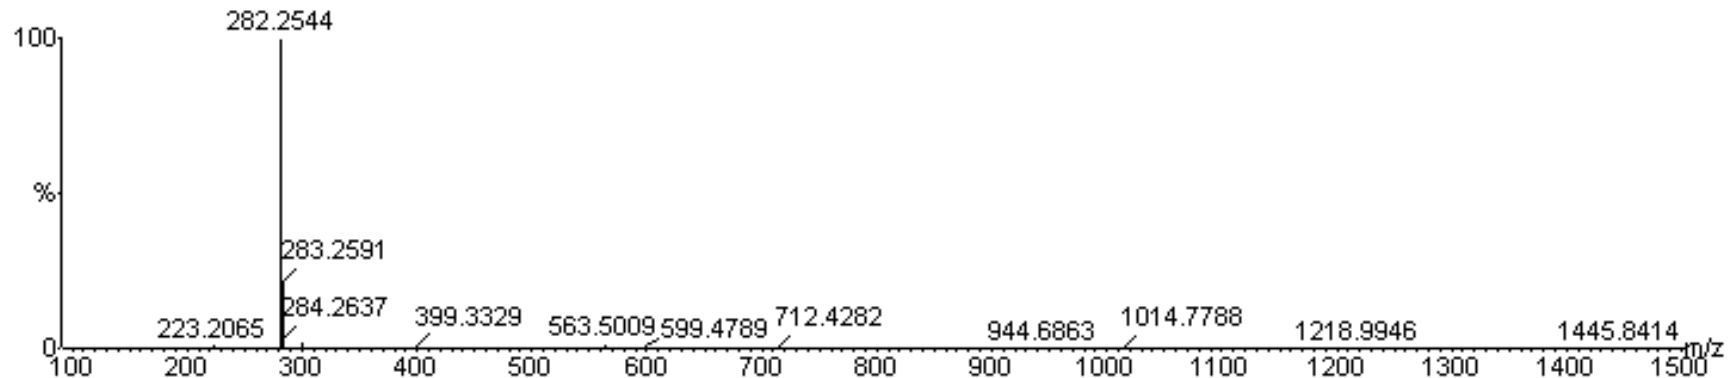

Minimum: -1.5  
Maximum: 5.0 20.0 100.0

| Mass     | Calc. Mass | mDa  | PPM  | DBE  | i-FIT | i-FIT (Norm) | Formula       |
|----------|------------|------|------|------|-------|--------------|---------------|
| 282.2544 | 282.2545   | -0.1 | -0.4 | 2.5  | 950.5 | 0.0          | C16 H32 N3 O  |
|          | 282.2505   | 3.9  | 13.8 | -1.5 | 958.8 | 8.3          | C11 H32 N5 O3 |

S16- crambescin B 281 (4) HRESIMS

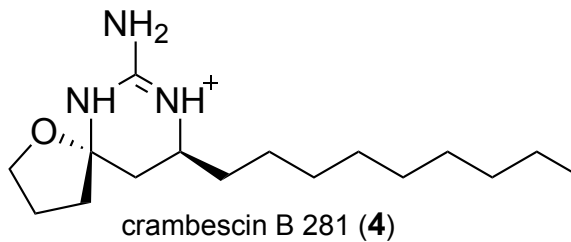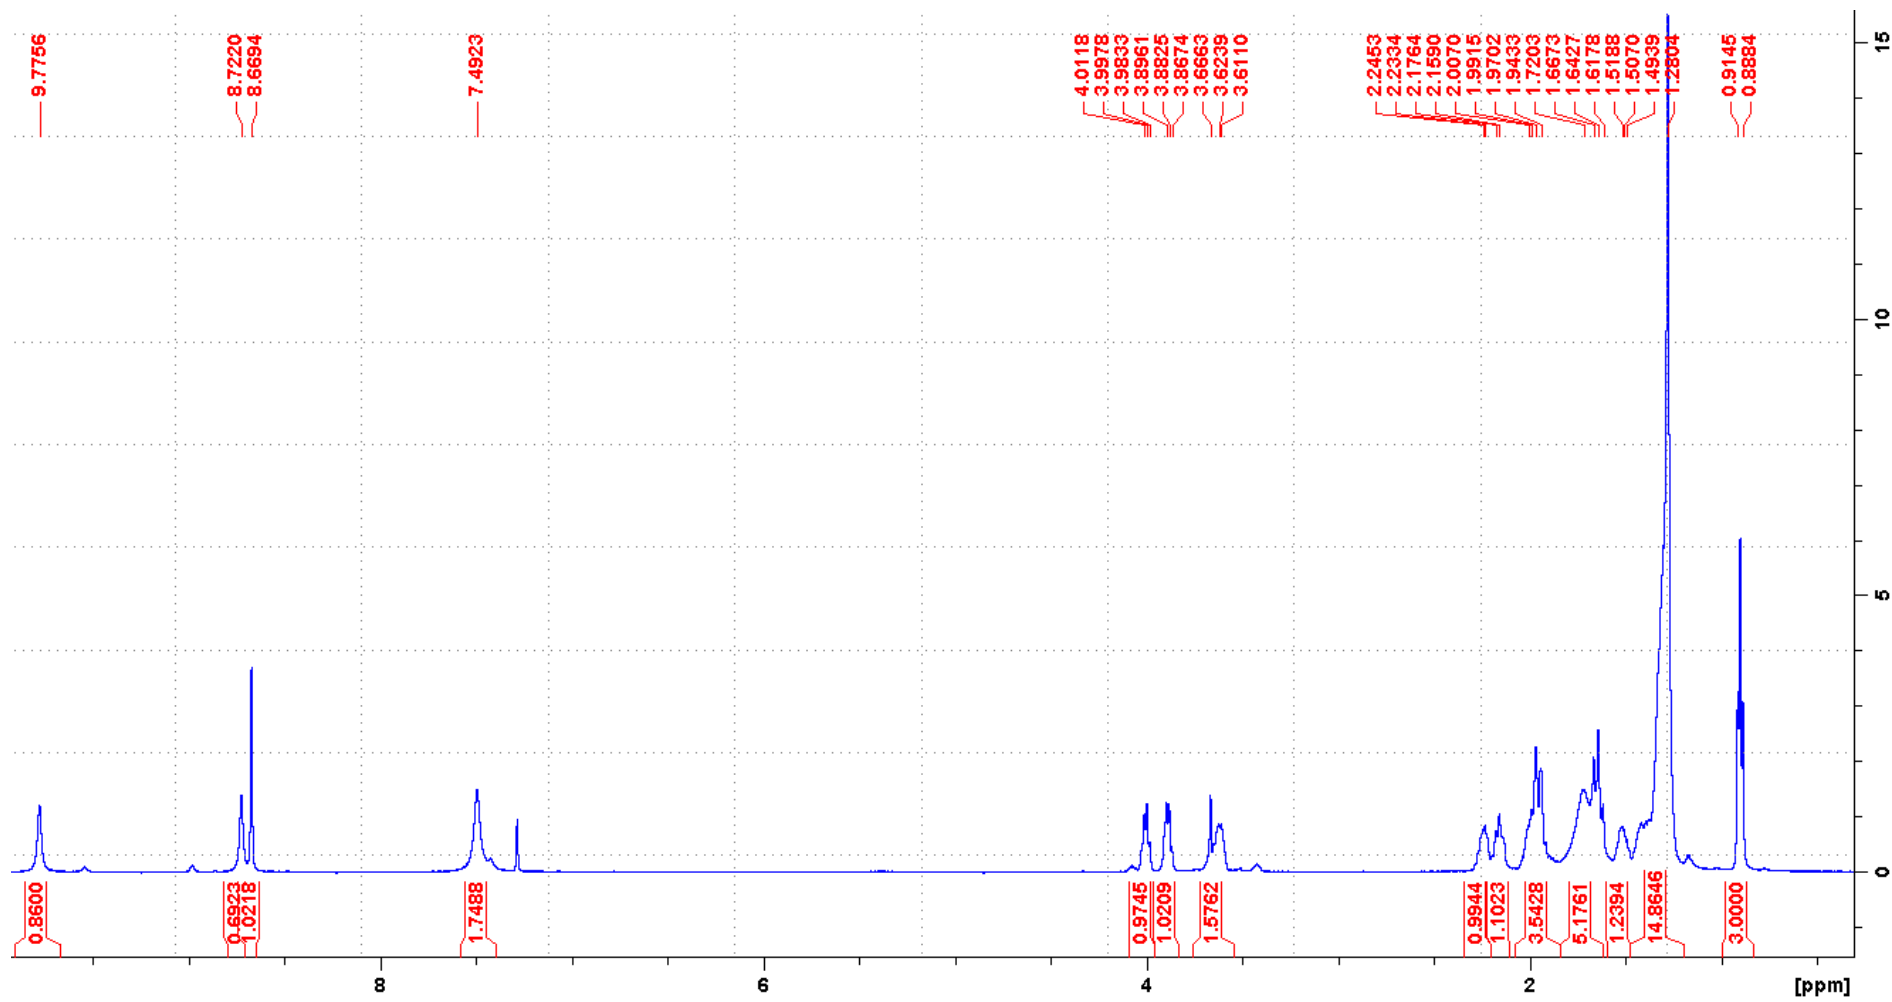

S17- crambescin B 281 (4)  $^1\text{H-NMR}$  spectrum (500 MHz,  $\text{CDCl}_3$ )

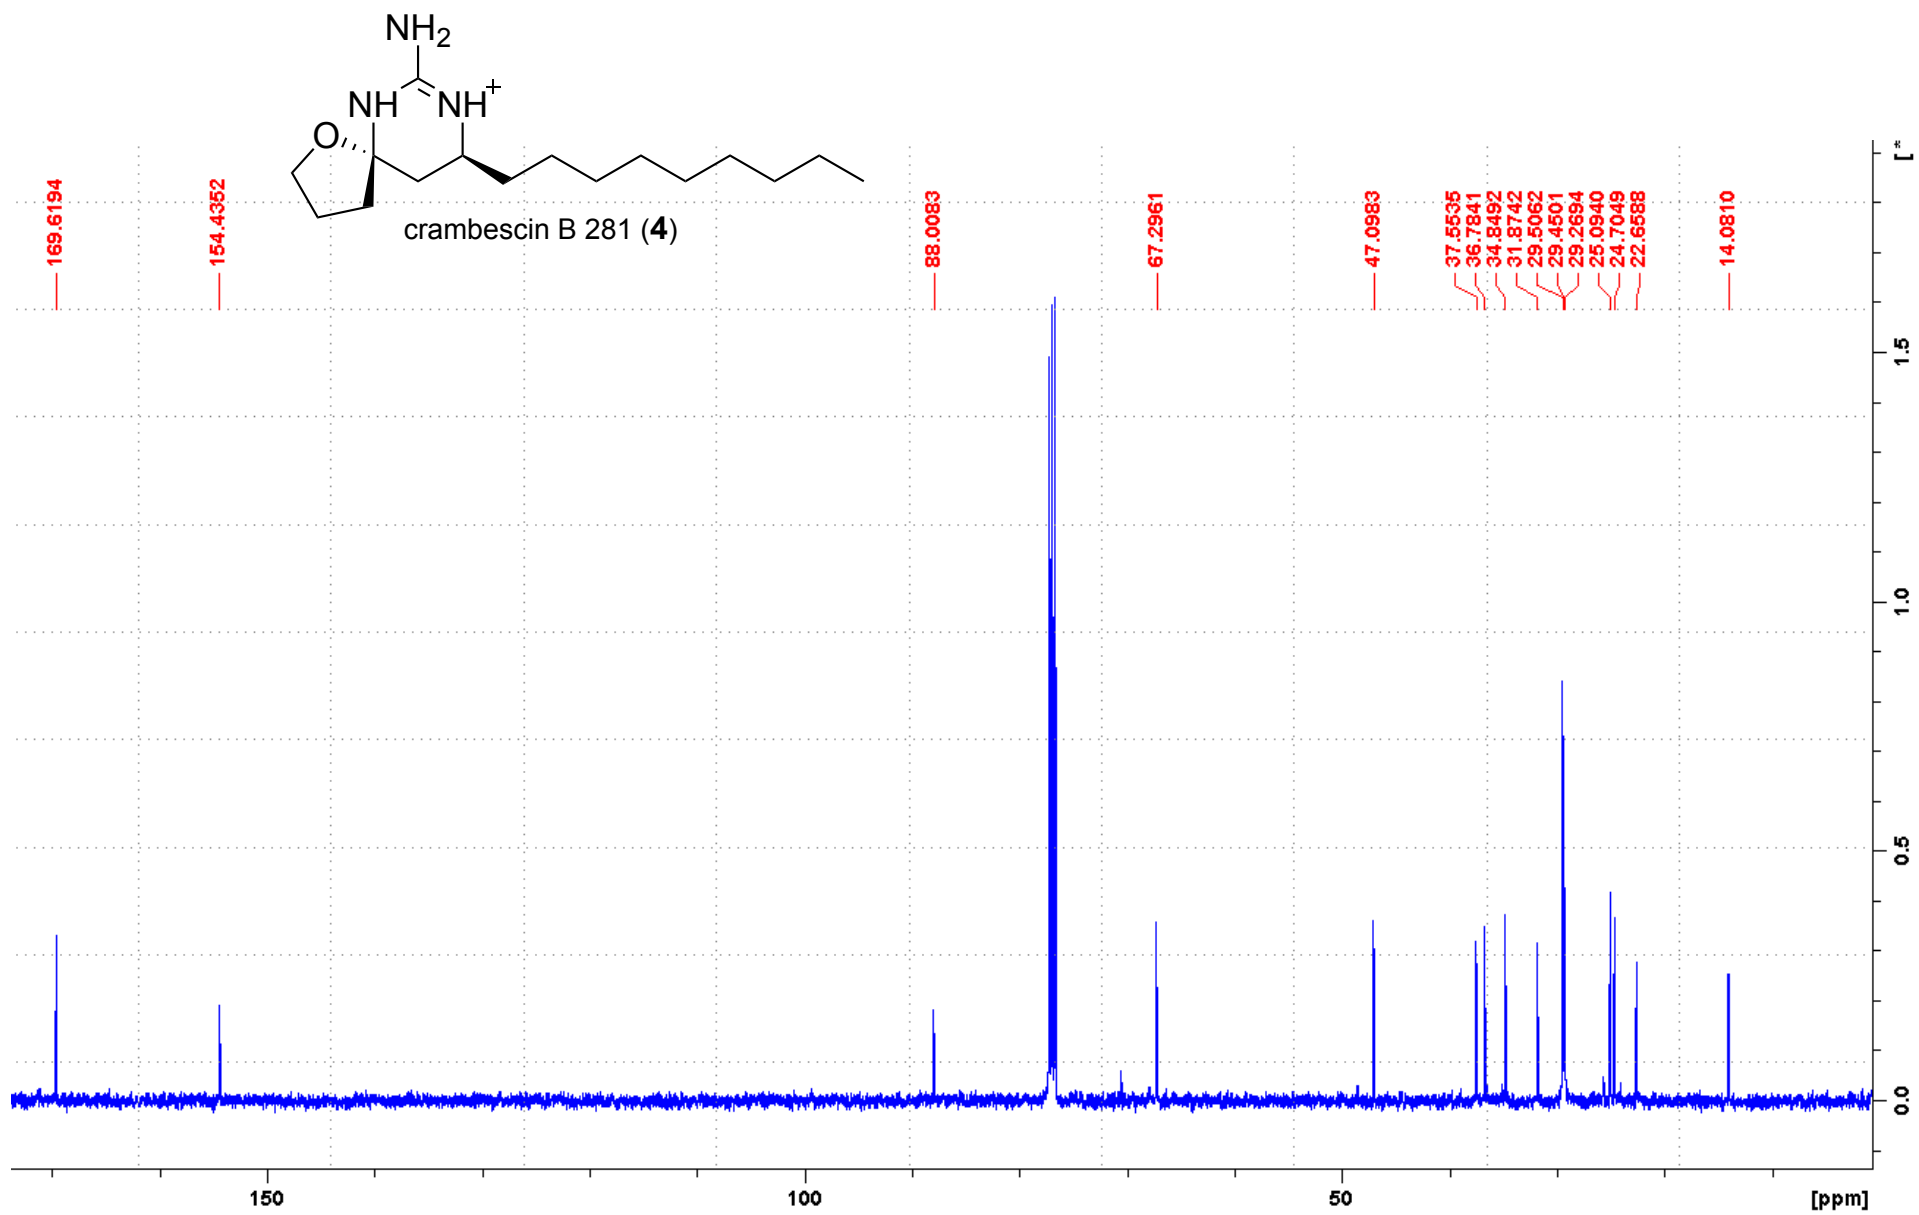

S18- crambescin B 281 (4) <sup>13</sup>C-NMR spectrum (125 MHz, CDCl<sub>3</sub>)

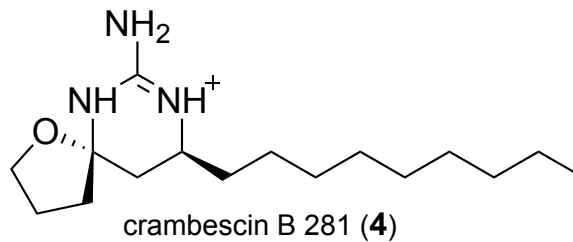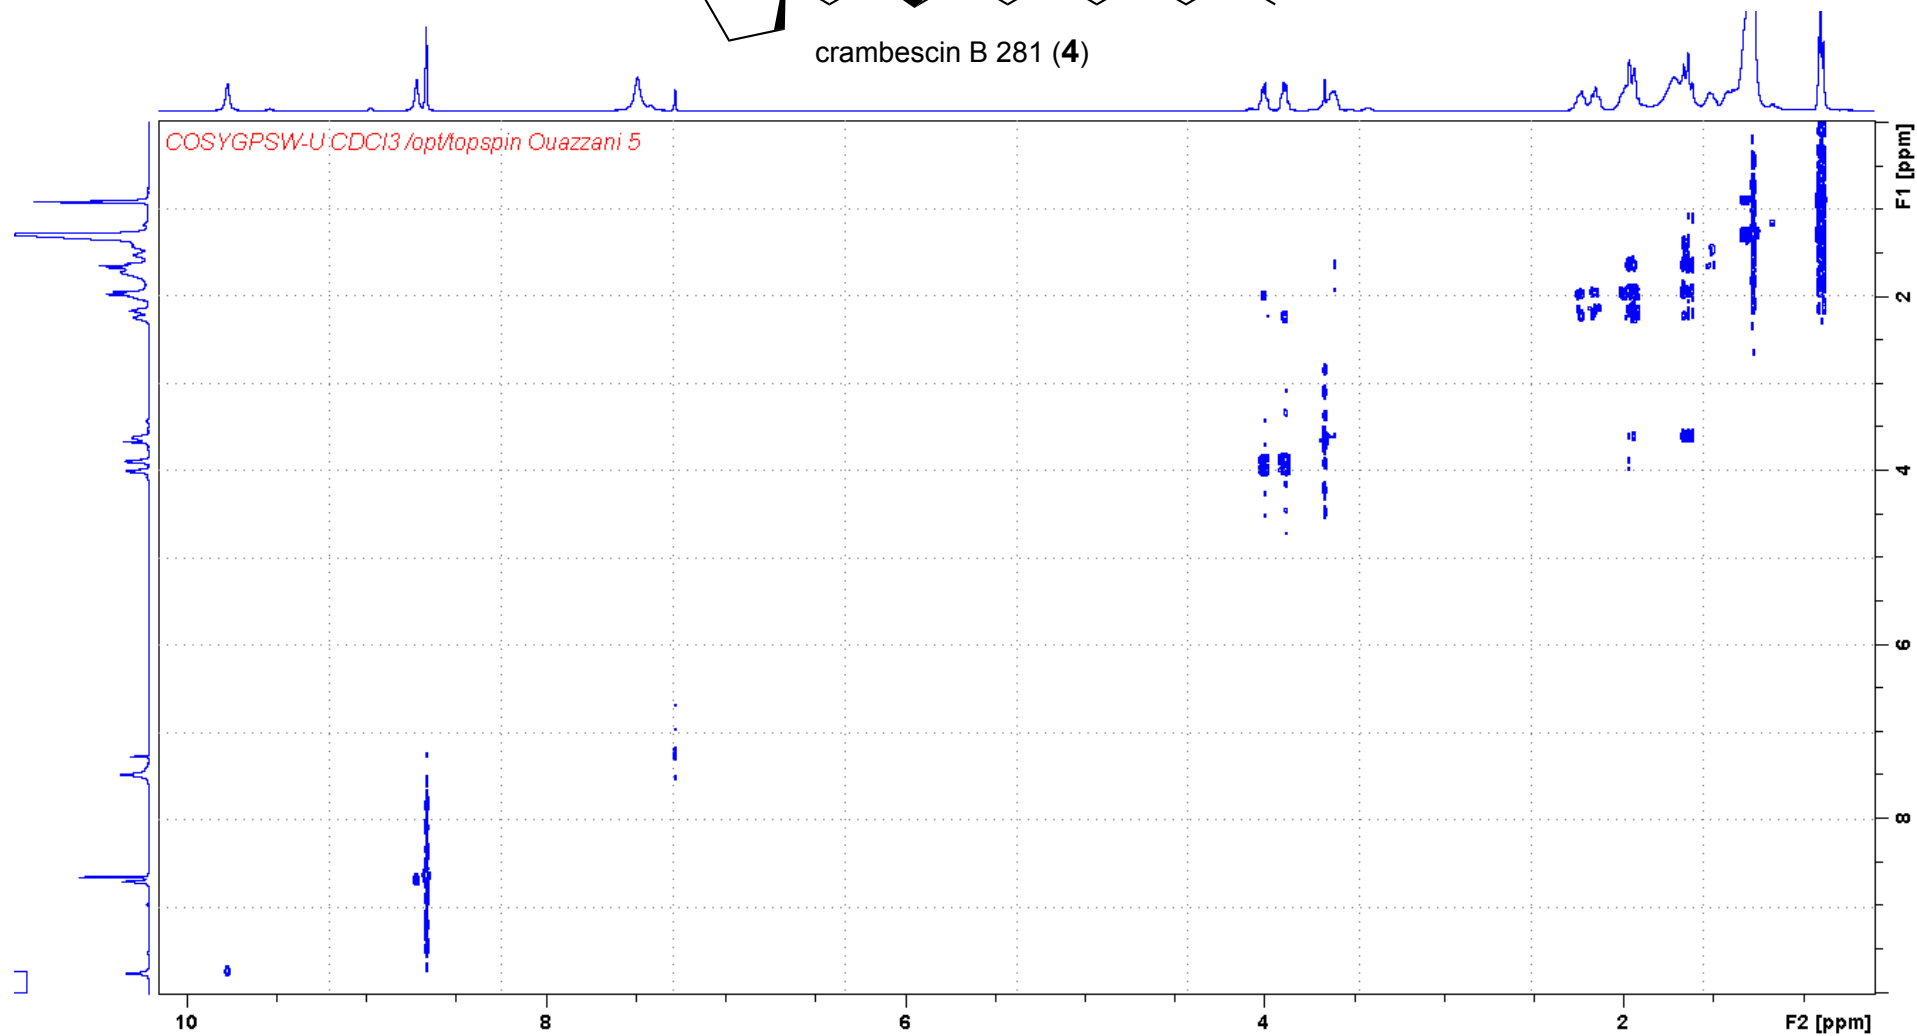

S19- crambescin B 281 (4) <sup>1</sup>H-<sup>1</sup>H COSY spectrum (500 MHz, CDCl<sub>3</sub>)

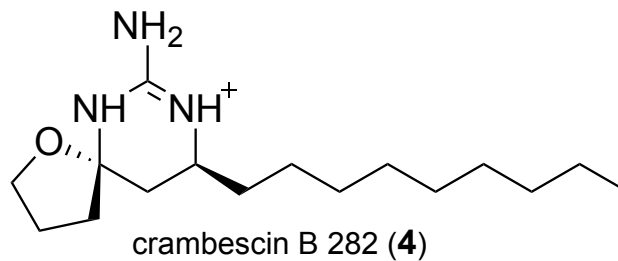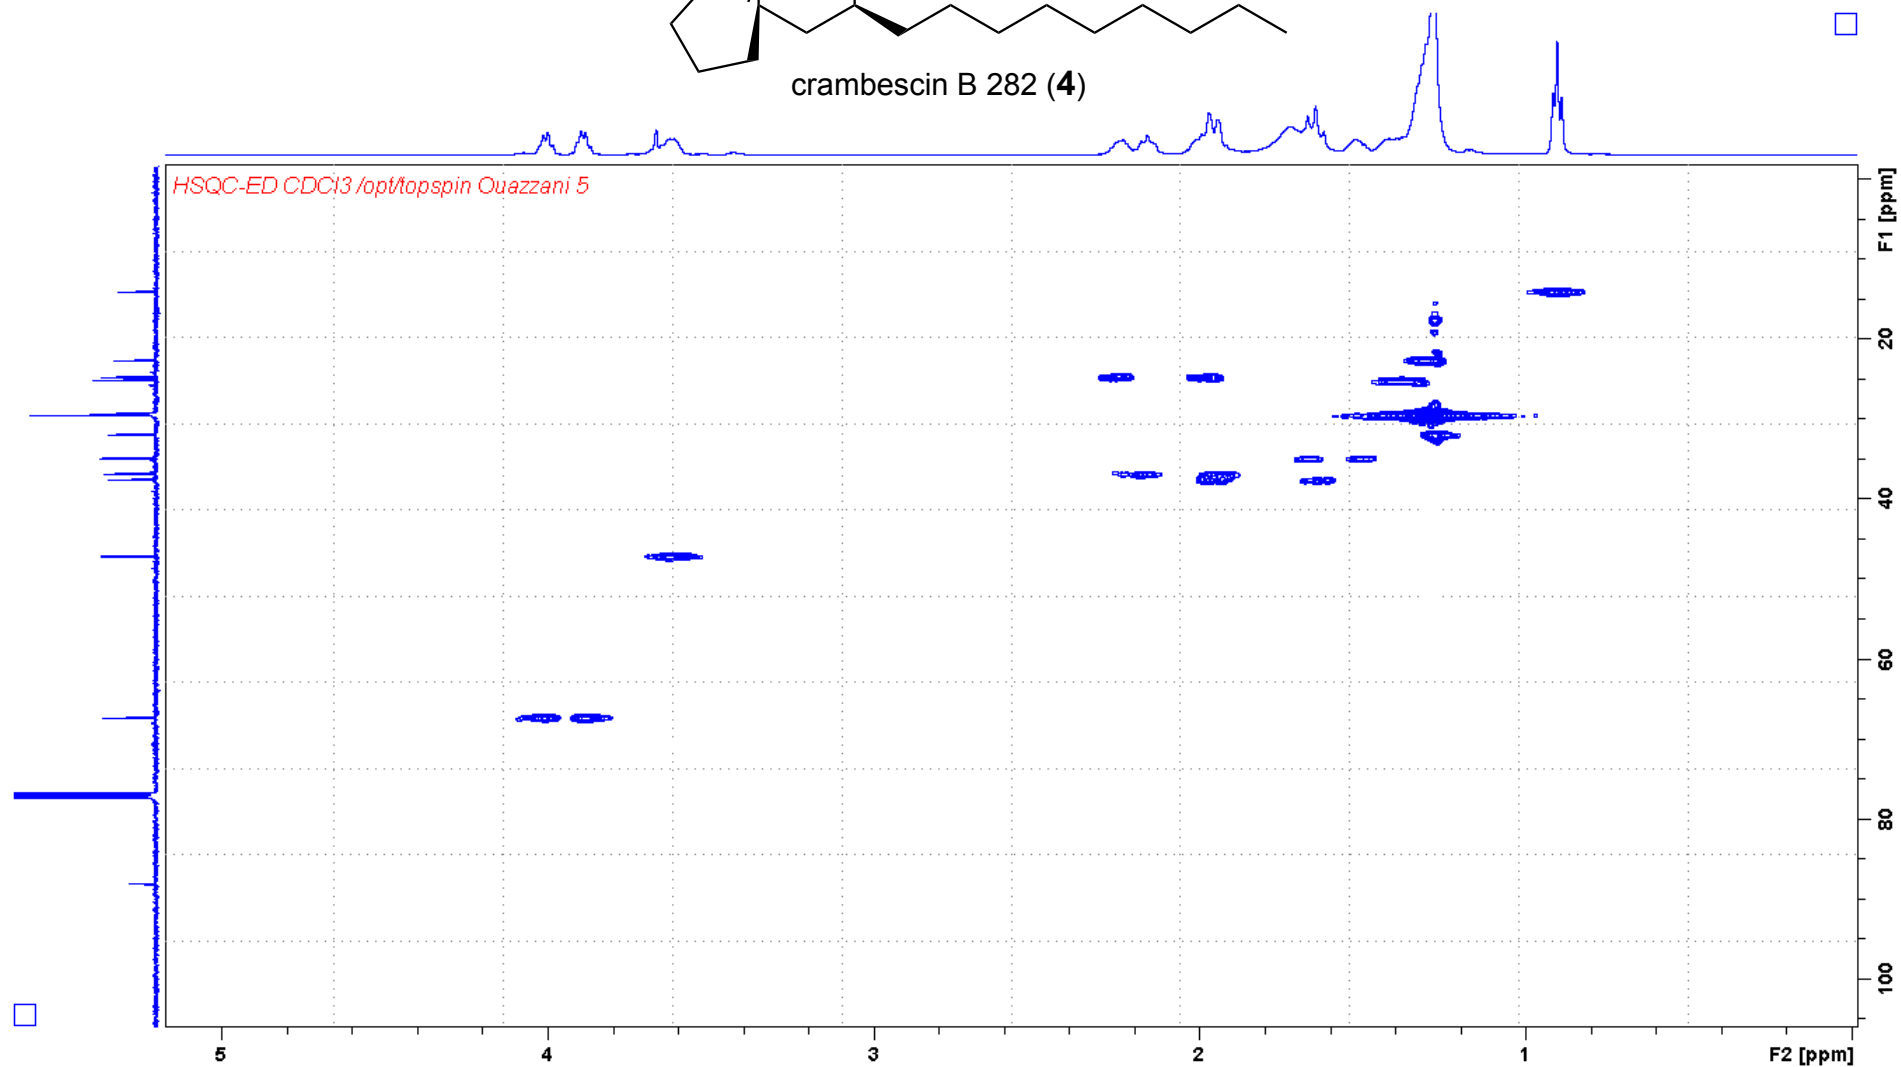

S20- crambescin B 282 (4) <sup>1</sup>H-<sup>13</sup>C HSQC spectrum (500 MHz, CDCl<sub>3</sub>)

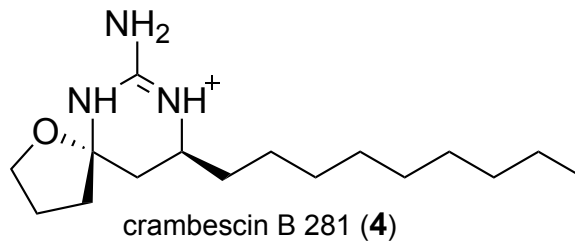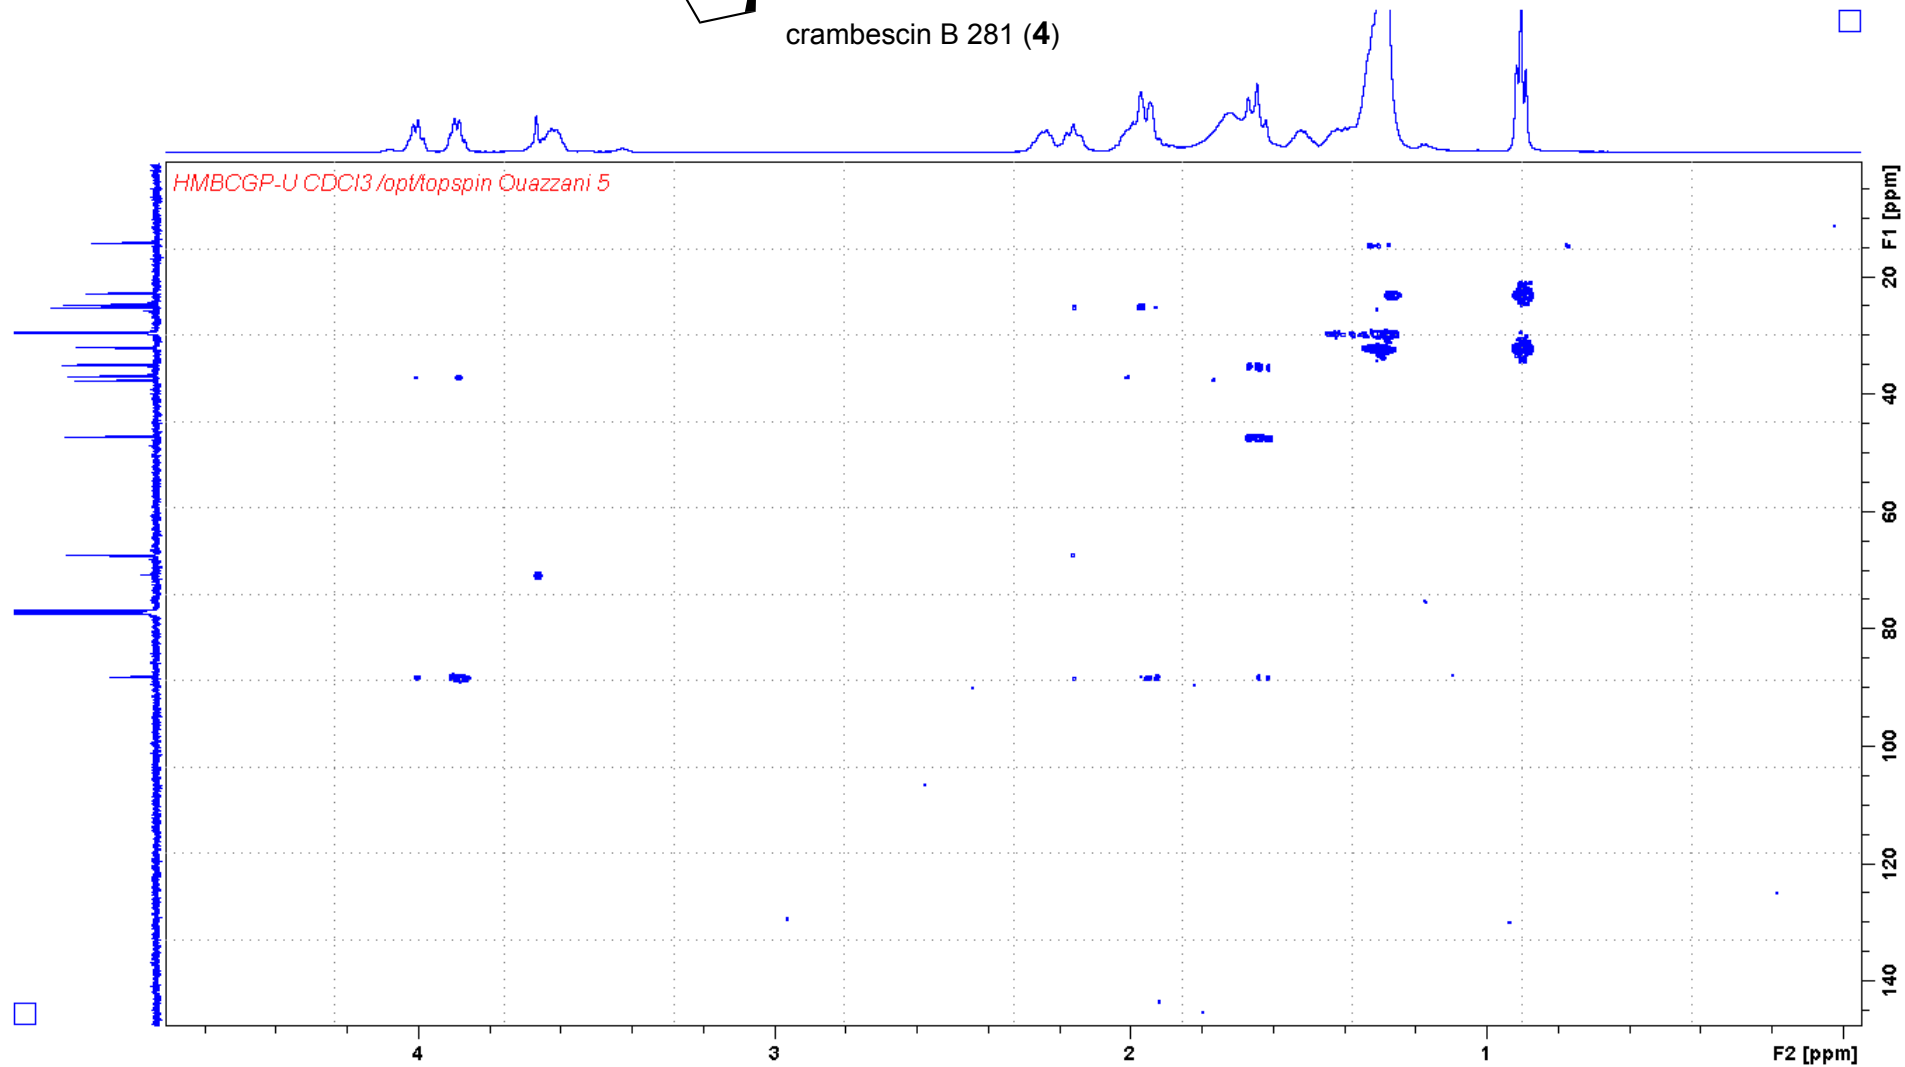

S21- crambescin B 281 (4) <sup>1</sup>H-<sup>13</sup>C HMBC spectrum (500 MHz, CDCl<sub>3</sub>)

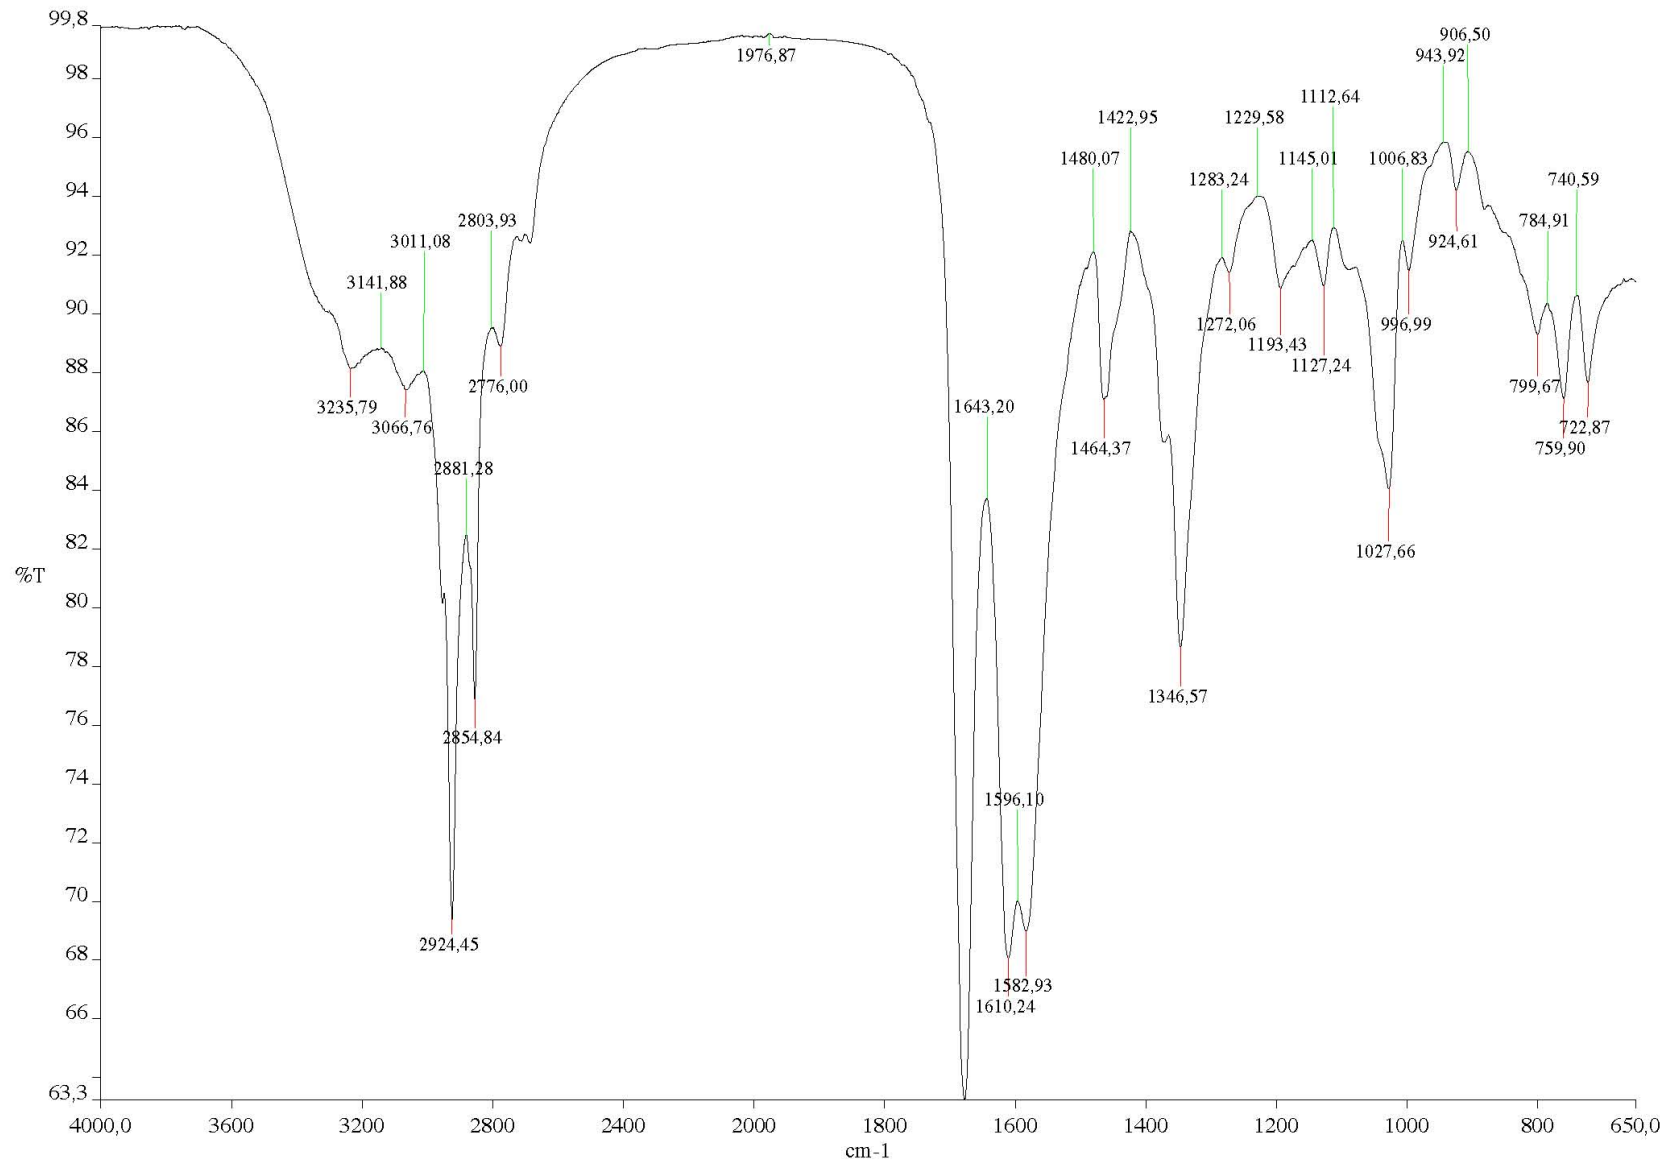

c:\pel\_data\spectra\eq95\crambescin b281.001

S22- crambescin B 281 (4) IR spectrum

## Elemental Composition Report

Page 1

### Single Mass Analysis

Tolerance = 20.0 PPM / DBE: min = -1.5, max = 100.0

Element prediction: Off

Number of isotope peaks used for i-FIT = 9

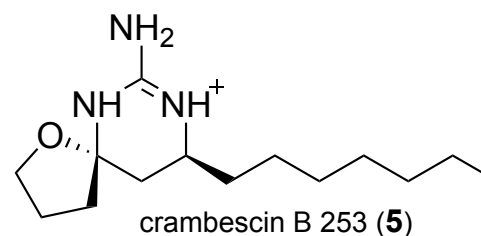

Monoisotopic Mass, Even Electron Ions

296 formula(e) evaluated with 2 results within limits (all results (up to 1000) for each mass)

Elements Used:

C: 0-50 H: 0-100 N: 0-10 O: 0-10

QUAZZANI\_glegoff57-2 23 (0.606) Cm (19:27-41:68x2.000)

1: TOF MS ES+  
2.58e+005

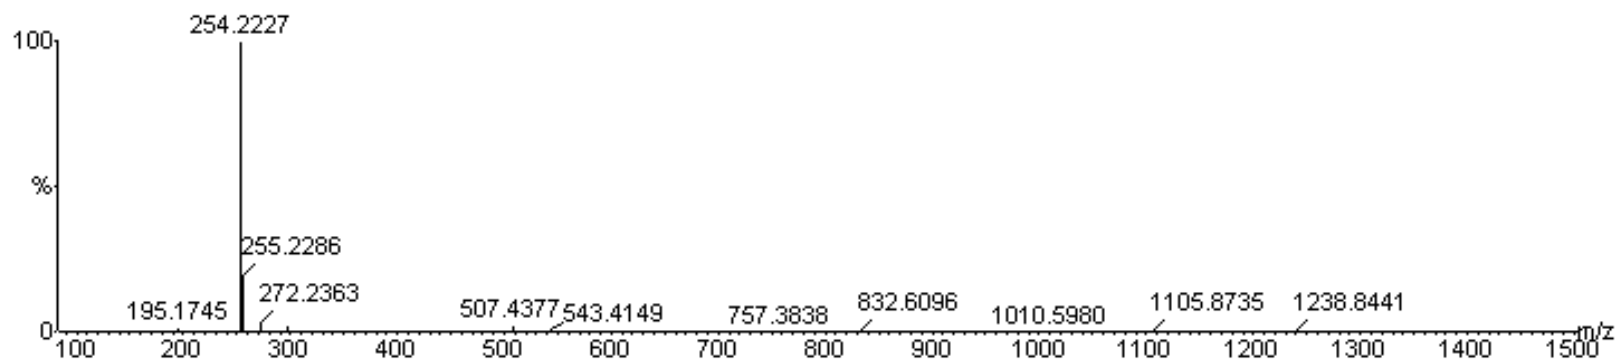

Minimum: -1.5  
Maximum: 5.0 20.0 100.0

| Mass     | Calc. Mass | mDa  | PPM  | DBE  | i-FIT | i-FIT (Norm) | Formula      |
|----------|------------|------|------|------|-------|--------------|--------------|
| 254.2227 | 254.2232   | -0.5 | -2.0 | 2.5  | 985.5 | 0.0          | C14 H28 N3 O |
|          | 254.2192   | 3.5  | 13.8 | -1.5 | 999.5 | 14.0         | C9 H28 N5 O3 |

S23- crambescin B 253 (5) HRESIMS



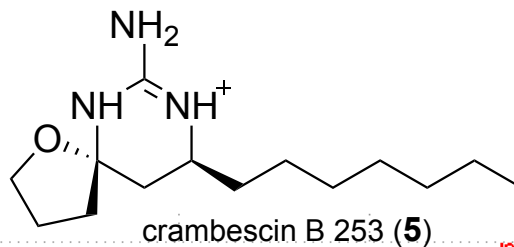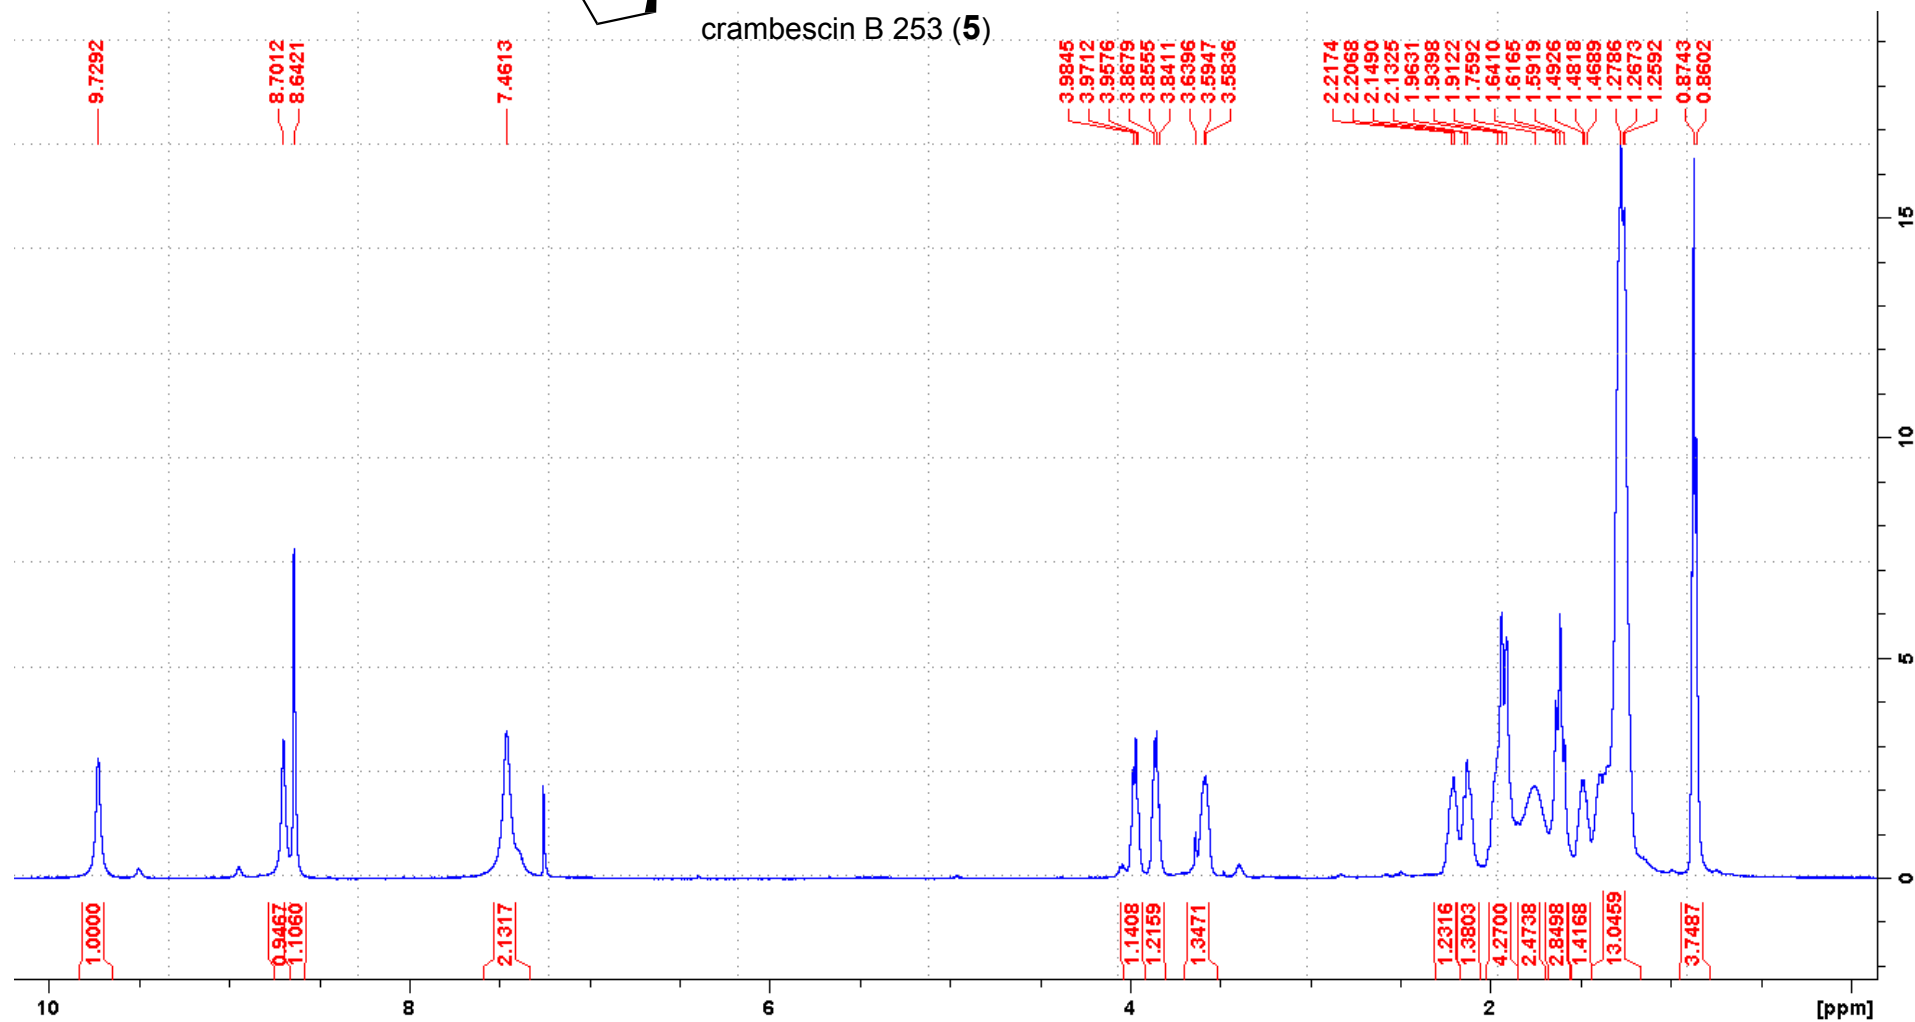

S24- crambescin B 253 (**5**) <sup>1</sup>H-NMR spectrum (500 MHz, CDCl<sub>3</sub>)

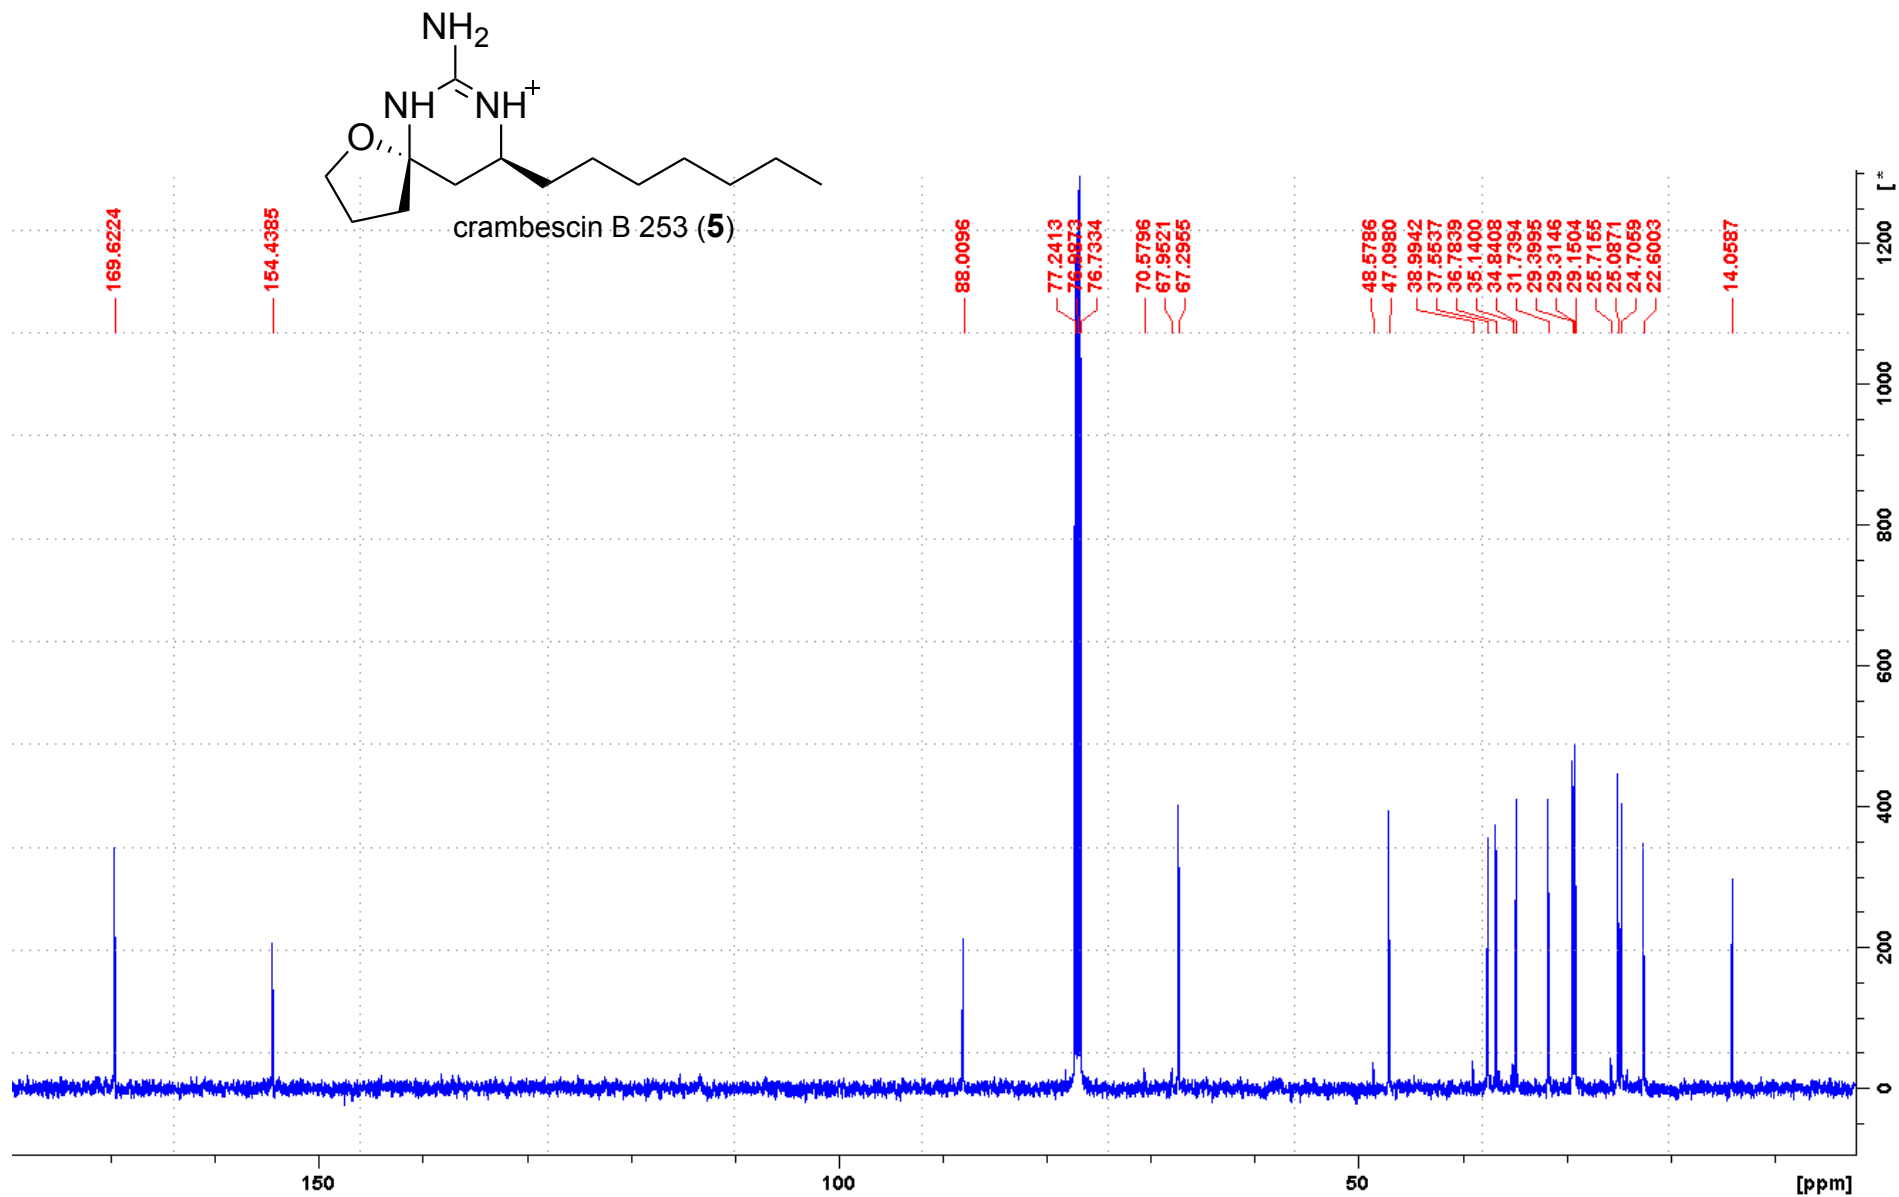

S25- crambescin B 253 (5)  $^{13}\text{C}$ -NMR spectrum (125 MHz,  $\text{CDCl}_3$ )

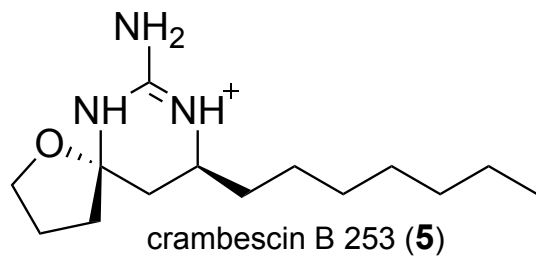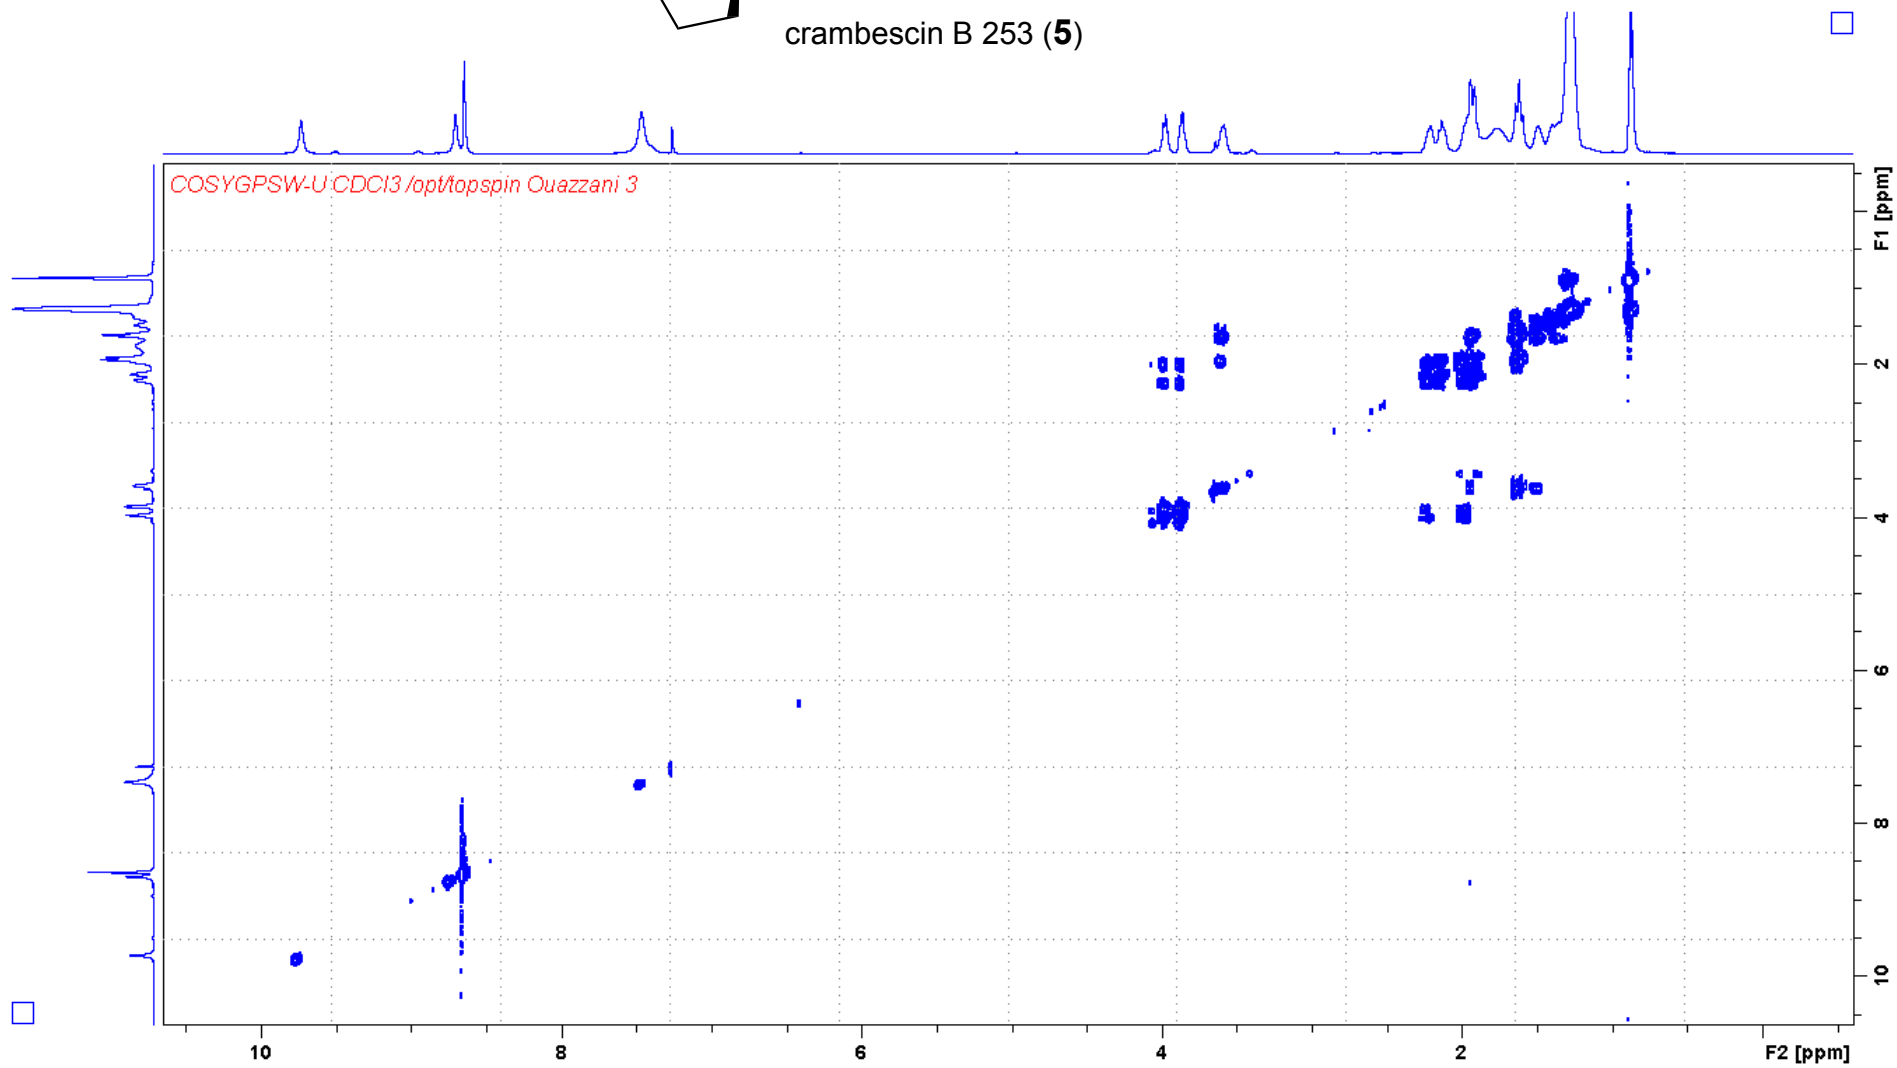

S26- crambescin B 253 (5) <sup>1</sup>H-<sup>1</sup>H COSY spectrum (500 MHz, CDCl<sub>3</sub>)

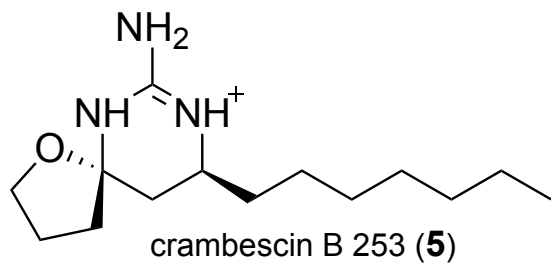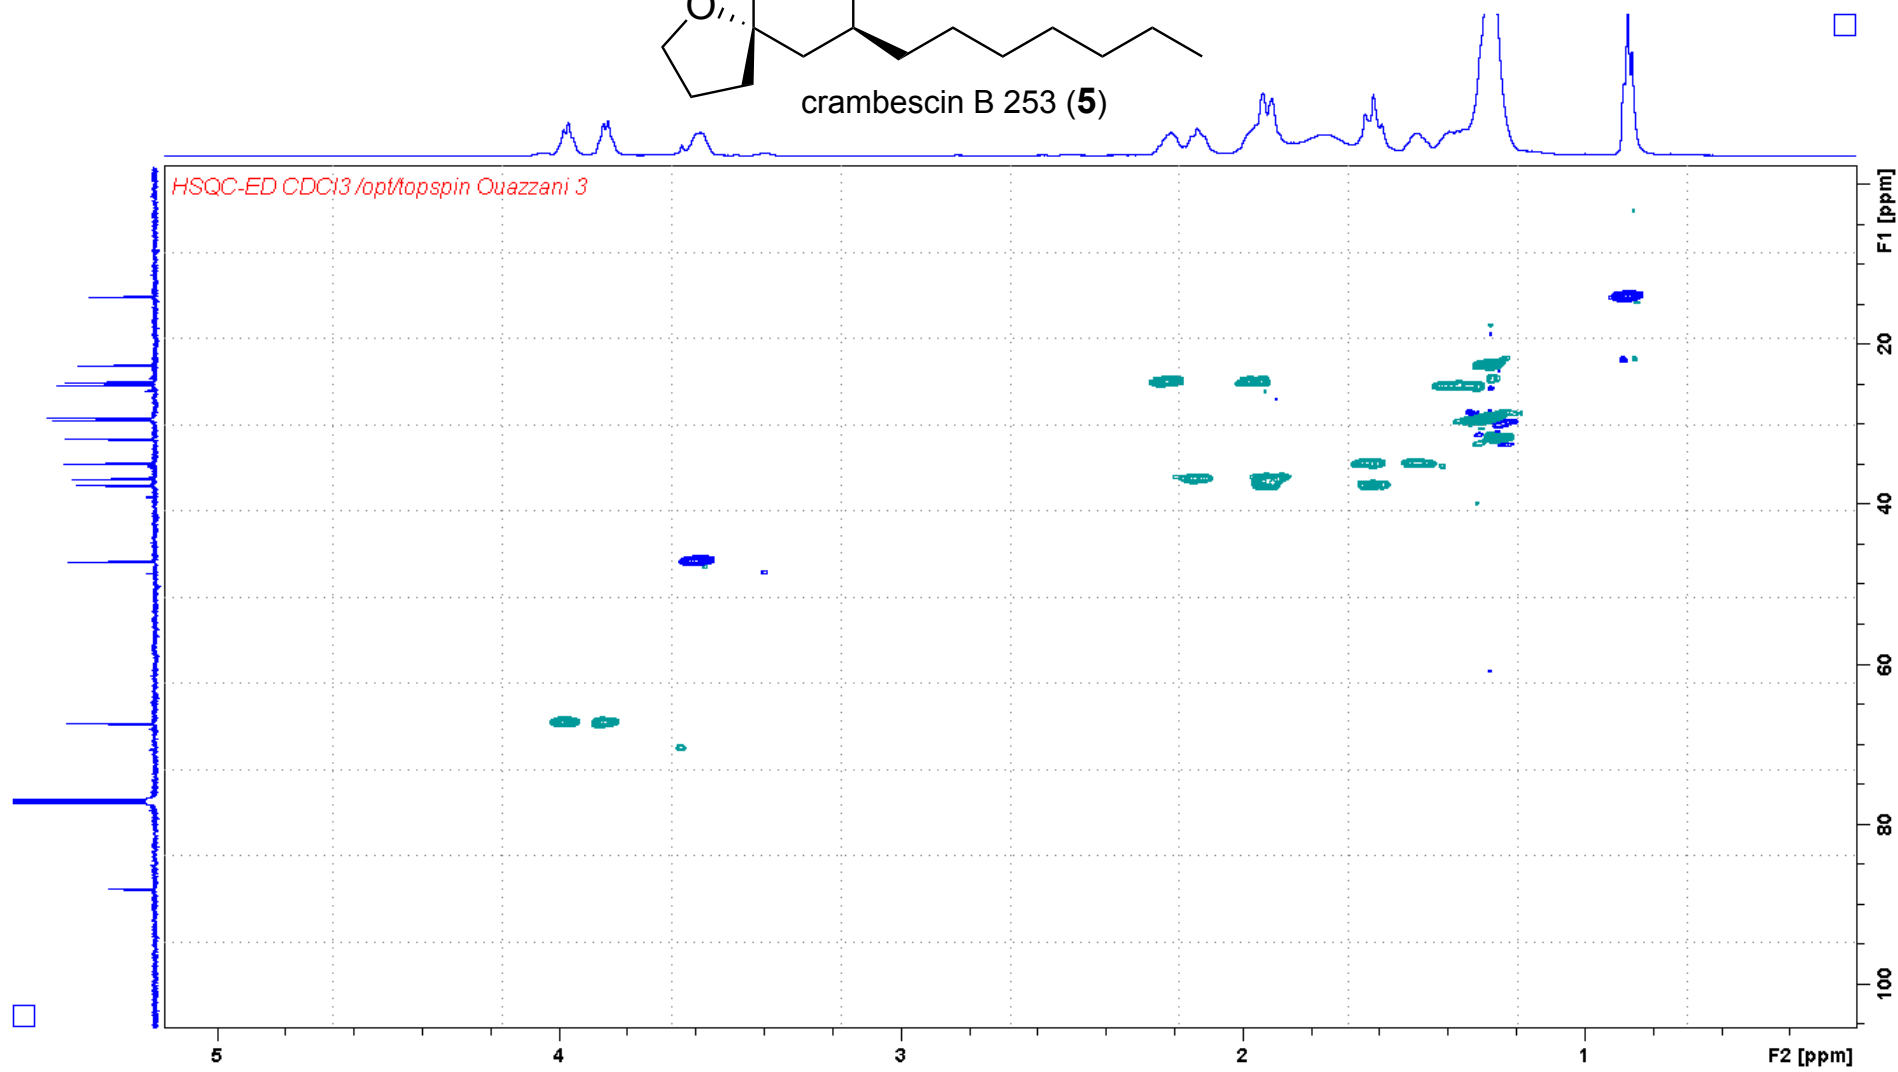

S27- crambescin B 253 (5) <sup>1</sup>H-<sup>13</sup>C HSQC-ED spectrum (500 MHz, CDCl<sub>3</sub>)

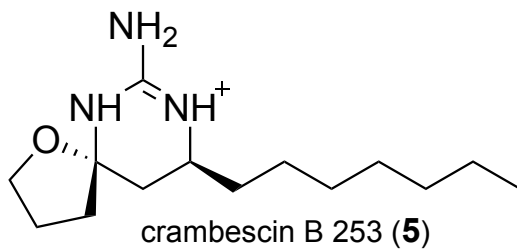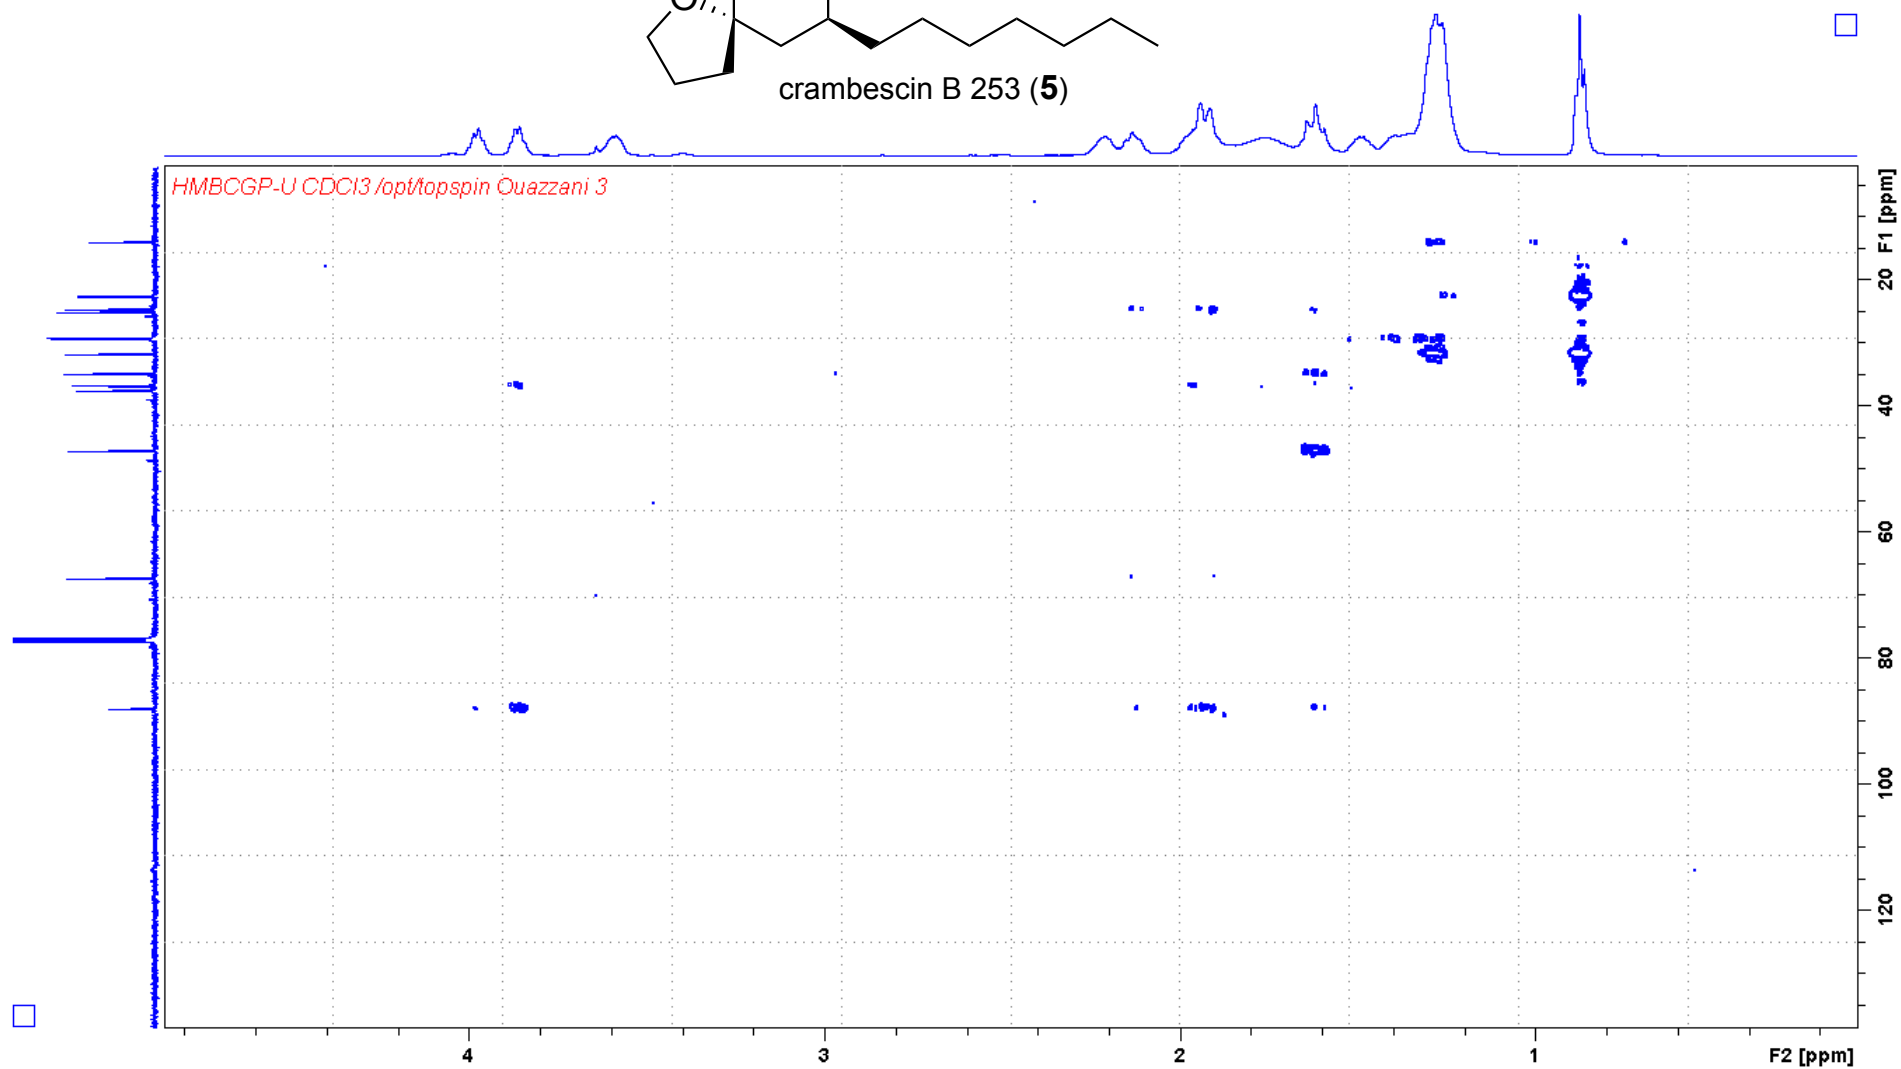

S28- crambescin B 253 (5) <sup>1</sup>H-<sup>13</sup>C HMBC spectrum (500 MHz, CDCl<sub>3</sub>)

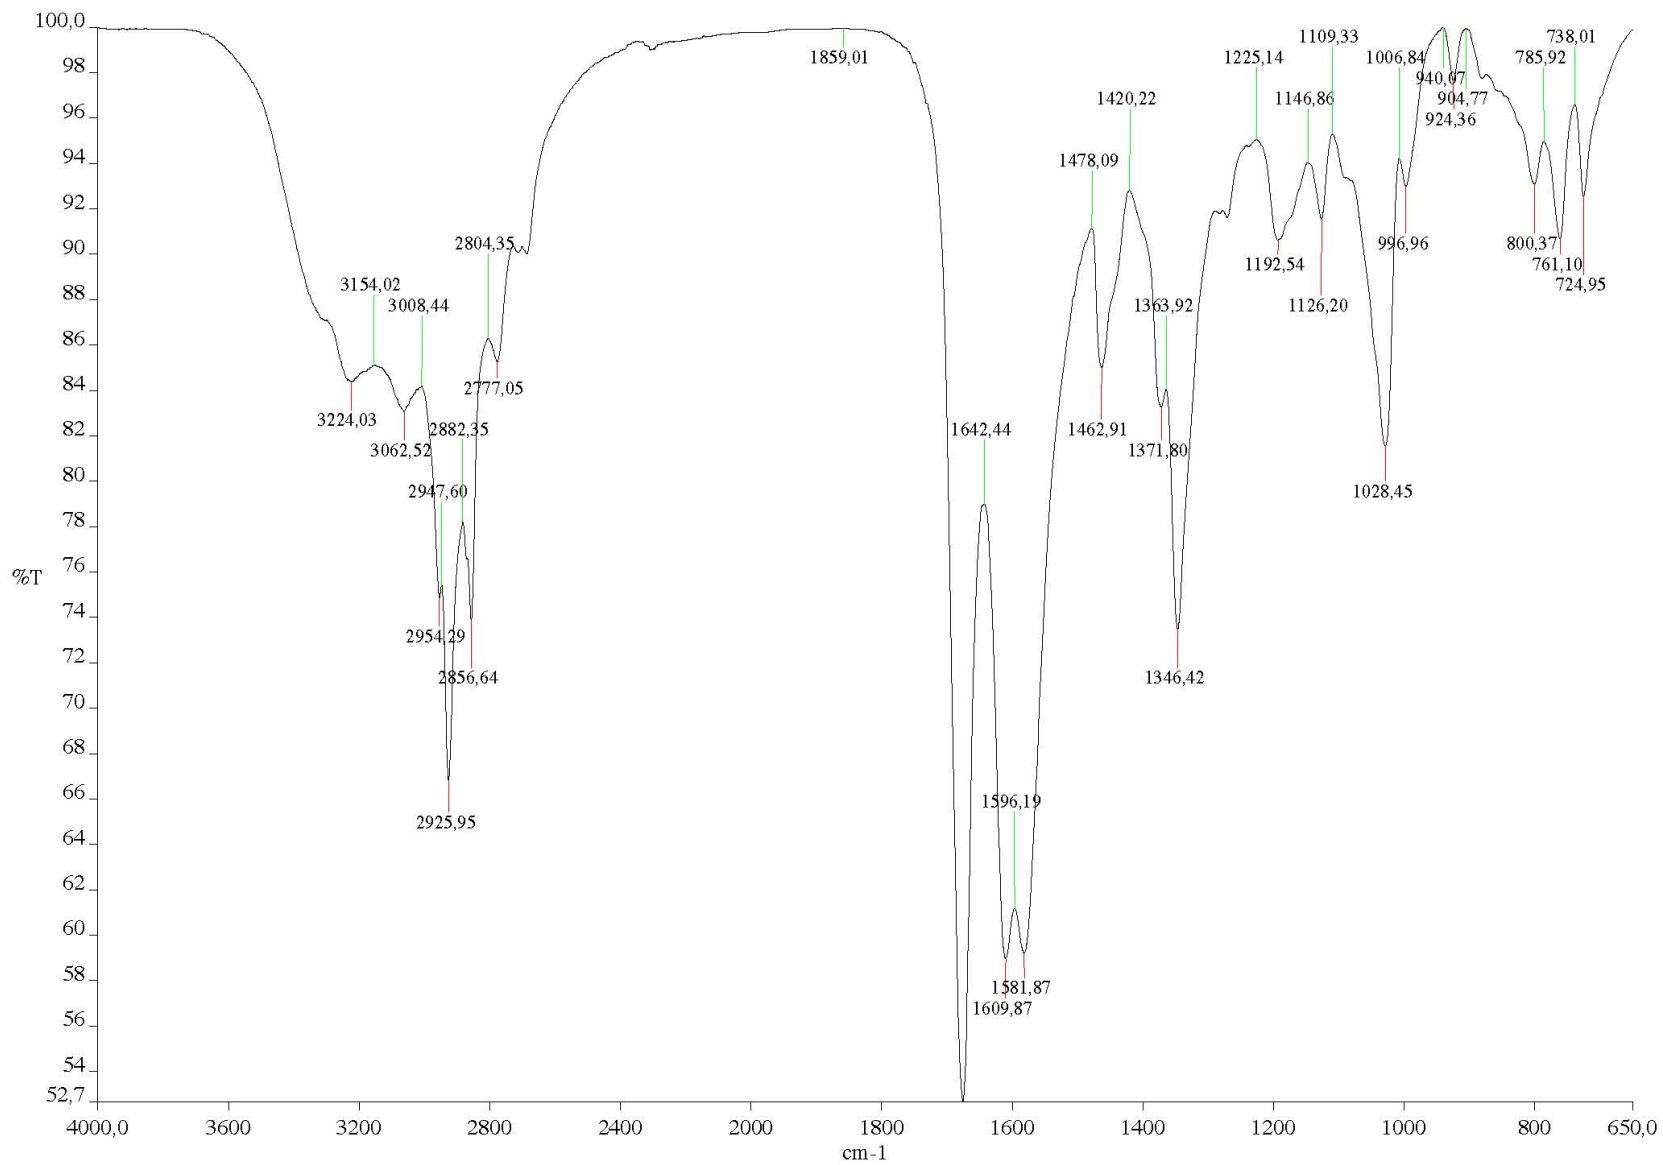

c:\pel\_data\spectra\eq95\crambescidin b253.002

S29- crambescidin 8 253 (5) IR spectrum

| Crambescidin 359 |                       |                                   |                    | Crambescidin acid     |                                   |                        | Crambescidin 401      |                                   |                        |
|------------------|-----------------------|-----------------------------------|--------------------|-----------------------|-----------------------------------|------------------------|-----------------------|-----------------------------------|------------------------|
| position         | $\delta_C$ , type     | $\delta_H$ , mult, <i>J</i> in Hz | HMBC               | $\delta_C$ , type     | $\delta_H$ , mult, <i>J</i> in Hz | HMBC                   | $\delta_C$ , type     | $\delta_H$ , mult, <i>J</i> in Hz | HMBC                   |
| 1                | 10.9, CH <sub>3</sub> | 0.84; t (7.4)                     | C-2, C-3           | 10.7, CH <sub>3</sub> | 0.80; t (7.3)                     | C-2, C-3               | 10.9, CH <sub>3</sub> | 0.88; m                           | C-2, C-3               |
| 2                | 30.3, CH <sub>2</sub> | 1.54, m; 1.46, m                  | -                  | 30.8, CH <sub>2</sub> | 1.54, m; 1.47, m                  | -                      | 30.2, CH <sub>2</sub> | 1.54, m; 1.46, m                  | -                      |
| 3                | 72.2, CH              | 4.36, br d (9.5)                  | -                  | 72.2, CH              | 4.34, br m                        | -                      | 72.2, CH              | 4.56, br m                        | -                      |
| 4                | 134.3, CH             | 5.51, br d (11.1)                 | C-3, C-6           | 134.5, CH             | 5.51, br d (11.2)                 | C-2, C-3, C-6          | 134.3, CH             | 5.54, br d (11.1)                 | C-3, C-6               |
| 5                | 131.4, CH             | 5.72, br dd (9.8, 11.1)           | C-3                | 131.7, CH             | 5.72, br m                        | C-3, C-6, C-7          | 131.4, CH             | 5.76, br m                        | C-3, C-6, C-7          |
| 6                | 24.5, CH <sub>2</sub> | 2.15, m; 2.43, m                  | C-4, C-5, C-8      | 24.6, CH <sub>2</sub> | 2.15, m; 2.43, m                  | C-4, C-5, C-7, C-8     | 24.5, CH <sub>2</sub> | 2.15, m; 2.43, m                  | C-4, C-5, C-7, C-8     |
| 7                | 38.4, CH <sub>2</sub> | 1.97, dd (5.9, 14.2); 2.34, m     | C-5, C-6, C-8, C-9 | 37.4, CH <sub>2</sub> | 2.02, m; 2.24 m                   | C-5, C-6, C-8, C-9     | 37.8, CH <sub>2</sub> | 2.02, m; 2.61 br t (13.4)         | C-5, C-6, C-8, C-9     |
| 8                | 85.1, C               | -                                 | -                  | 85.2, C               | -                                 | -                      | 86.6, C               | -                                 | -                      |
| 9                | 37.9, CH <sub>2</sub> | 1.47, m; 2.60 dd (4.6, 13.1)      | C-8, C-10, C-11    | 37.8, CH <sub>2</sub> | 1.50 m; 2.53 dd (3.3, 12.9)       | C-8, C-10, C-11        | 35.4, CH <sub>2</sub> | 1.6 t (12.9); 2.81 dd (3.3, 12.9) | C-8, C-10, C-11        |
| 10               | 55.1, CH              | 3.99-4.08, m                      | -                  | 55.8, CH              | 4.00, m                           | C-9                    | 60.1, CH              | 4.82, m                           | -                      |
| 11               | 30.9, CH <sub>2</sub> | 1.74, m; 2.32, m                  | -                  | 30.9, CH <sub>2</sub> | 1.74, m; 2.32, m                  | -                      | 30.5, CH <sub>2</sub> | 2.06, m; 2.68, m                  | C-12, C-13             |
| 12               | 30.2, CH <sub>2</sub> | 1.46-1.54, br m                   | -                  | 28.5, CH <sub>2</sub> | 2.06, m; 2.25, m                  | C-10, C-11, C-13       | 31.4, CH <sub>2</sub> | 3.38, m                           | C-10, C-11, C-13       |
| 13               | 53.5, CH              | 3.99-4.08, m                      | -                  | 54.9, CH              | 4.21, m                           | C-12, C-14, C-22       | 160.7, C              | -                                 | -                      |
| 14               | 40.4, CH <sub>2</sub> | 1.59, m; 2.60, dd (4.7, 13.2)     | C-13, C-15, C-16   | 54.1, CH              | 2.68, d (4.7)                     | C-13, C-15, C-16, C-22 | 123.6, C              | -                                 | -                      |
| 15               | 81.6, C               | -                                 | -                  | 82.8, C               | -                                 | -                      | 86.6, C               | -                                 | -                      |
| 16               | 34.4, CH <sub>2</sub> | 1.69-1.75, br m                   | -                  | 32.8, CH <sub>2</sub> | 1.27, m; 1.68, m                  | -                      | 37.4, CH <sub>2</sub> | 3.01-3.08, br m                   | C-14, C-17, C-18, C-22 |
| 17               | 19.5, CH <sub>2</sub> | 1.82, m                           | -                  | 19.8, CH <sub>2</sub> | 1.80, m; 1.87, m                  | C-15, C-16, C-22       | 25.1, CH <sub>2</sub> | 1.80, m; 1.87, m                  | C-15, C-16, C-22       |
| 18               | 33.3, CH <sub>2</sub> | 1.26, m; 1.69, m                  | C-17, C-19         | 34.5, CH <sub>2</sub> | 1.48, br m                        | -                      | 39.5, CH <sub>2</sub> | 1.48, br m                        | -                      |
| 19               | 66.3, CH              | 3.75, m                           | -                  | 67.8, CH              | 3.81, m                           | C-17, C-18             | 68.0, CH              | 3.74, m                           | C-17                   |
| 20               | 21.9, CH <sub>3</sub> | 1.08, d (6.2)                     | C-18, C-19         | 22.1, CH <sub>3</sub> | 1.08, d (6.2)                     | C-18, C-19             | 21.9, CH <sub>3</sub> | 1.14, d (6.2)                     | C-18, C-19             |
| 21               | 148.9, C              | -                                 | -                  | 150.8, C              | -                                 | -                      | 151.3, C              | -                                 | -                      |
| 22               | 175.1, C              | -                                 | -                  | 175.1, C              | -                                 | -                      | 179.5, C              | -                                 | -                      |

S30- <sup>1</sup>H NMR (500 MHz) and <sup>13</sup>C NMR (125 MHz) for crambescidin 359

<sup>1</sup>H NMR (600 MHz cryoprobe) and <sup>13</sup>C NMR (150 MHz) for crambescidin acid and crambescidin 401

| Crambescin B 281 |                       |                            |                    | Crambescin B 253      |                            |                    |
|------------------|-----------------------|----------------------------|--------------------|-----------------------|----------------------------|--------------------|
| position         | $\delta_C$ , type     | $\delta_H$ , mult, J in Hz | HMBC               | $\delta_C$ , type     | $\delta_H$ , mult, J in Hz | HMBC               |
| 1                | 154.4, C              | -                          | -                  | 154.4, C              | -                          | -                  |
| 2                | 88.0, C               | -                          | -                  | 88.0, C               | -                          | -                  |
| 3                | 67.3, CH <sub>2</sub> | 3.86, 3.98; dd (6.5, 12.8) | C-2, C-4           | 67.3, CH <sub>2</sub> | 3.86, 3.98; dd (6.5, 12.8) | C-2, C-4           |
| 4                | 54.7, CH <sub>2</sub> | 1.97, 2.22; m              | -                  | 54.7, CH <sub>2</sub> | 1.97, 2.22; m              | -                  |
| 5                | 36.8, CH <sub>2</sub> | 1.91, 2.14; m              | C-2, C-4           | 36.8, CH <sub>2</sub> | 1.91, 2.14; m              | C-2, C-4           |
| 6                | 37.7, CH <sub>2</sub> | 1.62, 1.93; m              | C-2, C-7, C-8, C-9 | 37.7, CH <sub>2</sub> | 1.62, 1.93; m              | C-2, C-7, C-8, C-9 |
| 7                | 47.1, CH              | 3.59; m                    | -                  | 47.1, CH              | 3.59; m                    | -                  |
| 8                | 34.9, CH <sub>2</sub> | 1.49, 1.63; m              | C-7                | 34.9, CH <sub>2</sub> | 1.49, 1.63; m              | C-7                |
| 9                | 25.1, CH <sub>2</sub> | 1.22-1.14; m               | -                  | 25.1, CH <sub>2</sub> | 1.22-1.13; m               | -                  |
| 10               | 29.5, CH <sub>2</sub> | 1.22-1.14; m               |                    | 29.4, CH <sub>2</sub> | 1.22-1.13; m               | -                  |
| 11               | 29.5, CH <sub>2</sub> | 1.22-1.14; m               |                    | 29.2, CH <sub>2</sub> | 1.22-1.13; m               | -                  |
| 12               | 29.4, CH <sub>2</sub> | 1.22-1.14; m               | -                  | 38.1, CH <sub>2</sub> | 1.22-1.13; m               | -                  |
| 13               | 29.3, CH <sub>2</sub> | 1.22-1.14; m               | -                  | 22.9, CH <sub>2</sub> | 1.22-1.13; m               | -                  |
| 14               | 38.1, CH <sub>2</sub> | 1.22-1.14; m               | -                  | 14.1, CH <sub>3</sub> | 0.87; t (7.1)              | C-12, C-13         |
| 15               | 22.9, CH <sub>2</sub> | 1.22-1.14; m               | -                  |                       |                            |                    |
| 16               | 14.1, CH <sub>3</sub> | 0.87; t (7.1)              | C-14, C-15         |                       |                            |                    |

S31- <sup>1</sup>H NMR (500 MHz) and <sup>13</sup>C NMR (125 MHz) for crambescin 281 and crambescin 253
